1        **Pre-existing antibodies targeting a linear epitope on SARS-CoV-2 S2**  
2        **cross-reacted with commensal gut bacteria and shaped vaccine induced**  
3        **immunity**

4        Liqiu Jia<sup>1, §</sup>, Shufeng Weng<sup>2, §</sup>, Jing Wu<sup>1, §</sup>, Xiangxiang Tian<sup>3, 4</sup>, Yifan Zhang<sup>3, 4</sup>,  
5        Xuyang Wang<sup>1</sup>, Jing Wang<sup>3, 5</sup>, Dongmei Yan<sup>5</sup>, Wanhai Wang<sup>4</sup>, Zhaoqin Zhu<sup>3, #</sup>,  
6        Chao Qiu<sup>6, #</sup>, Wenhong Zhang<sup>1, 2, 7, 8, #</sup>, Ying Xu<sup>2, #</sup>, Yanmin Wan<sup>1, 2, 9, #</sup>

7

8        <sup>1</sup> Department of Infectious Diseases, National Medical Center for Infectious Diseases,  
9        Shanghai Key Laboratory of Infectious Diseases and Biosafety Emergency Response,  
10        Huashan Hospital, Shanghai Medical College, Fudan University, Shanghai, China;

11        <sup>2</sup> State Key Laboratory of Genetic Engineering, Institute of Genetics, School of Life  
12        Science, Fudan University, Shanghai, China;

13        <sup>3</sup> Department of laboratory medicine, Shanghai Public Health Clinical Center, Shanghai,  
14        China;

15        <sup>4</sup> Clinical Laboratory, The First Affiliated Hospital of Zhengzhou University, Key Laboratory  
16        of Laboratory Medicine of Henan Province, Zhengzhou, Henan, P.R. China;

17        <sup>5</sup> Department of Immunology, School of Basic Medical, Jiamusi University, Jiamusi,  
18        Heilongjiang Province, China;

19        <sup>6</sup> Institutes of biomedical sciences & Shanghai Key Laboratory of Medical Epigenetics,  
20        Fudan University, Shanghai, China;

21        <sup>7</sup> National Clinical Research Center for Aging and Medicine, Huashan Hospital, Shanghai  
22        Medical College, Fudan University, Shanghai, China;

23        <sup>8</sup> Key Laboratory of Medical Molecular Virology (MOE/MOH) and Institutes of Biomedical  
24        Sciences, Shanghai Medical College, Fudan University, Shanghai, China.

25        <sup>9</sup> Department of radiology, Shanghai Public Health Clinical Center, Shanghai, China

26        § These authors contribute equally to this work.

27        # Correspondence should be addressed to: Zhaoqin Zhu, zhaqinzh@163.com; Chao  
28        Qiu, qiuchao@fudan.edu.cn; Wenhong Zhang, zhangwenhong@fudan.edu.cn; Ying Xu,  
29        yingxu2520@fudan.edu.cn; Yanmin Wan, yanmin\_wan@fudan.edu.cn

30

31        **Running title:** SARS-CoV-2 antibody cross-reacts with gut bacteria

32        **Word count:** Abstract, 214; main text, 6208

33        **NOTE:** This preprint reports new research that has not been certified by peer review and should not be used to guide clinical practice.

34 **Abstract**

35 The origins of pre-existing SARS-CoV-2 cross-reactive antibodies and their  
36 potential impacts on vaccine efficacy have not been fully clarified. In this study,  
37 we demonstrated that S2 was the prevailing target of the pre-existing S protein  
38 cross-reactive antibodies in both healthy human and SPF mice. A dominant  
39 antibody epitope was identified on the connector domain of S2  
40 (1147-SFKEELDKYFKNHT-1160, P144), which could be recognized by  
41 pre-existing antibodies in both human and mouse. Through metagenomic  
42 sequencing and fecal bacteria transplant, we proved that the generation of S2  
43 cross-reactive antibodies was associated with commensal gut bacteria.  
44 Furthermore, six P144 specific monoclonal antibodies were isolated from  
45 mouse and proved to cross-react with commensal gut bacteria collected from  
46 both human and mouse. Mice with high levels of pre-existing S2 cross-reactive  
47 antibodies mounted higher S protein specific binding antibodies, especially  
48 against S2, after being immunized with a candidate COVID-19 DNA vaccine.  
49 Similarly, we found that levels of pre-existing antibodies against both S2 and  
50 P144 correlated positively with RBD specific binding antibody titers after two  
51 doses of inactivated SARS-CoV-2 vaccination in human. Taken together, our  
52 findings revealed that the pre-existing cross-reactive antibodies against  
53 SARS-CoV-2 spike protein could be induced by commensal gut bacteria and  
54 suggested that these pre-existing cross-reactive antibodies could facilitate the  
55 induction of S protein specific antibody responses after vaccination.

56

57 **Key words:** Cross-reactive antibody, SARS-CoV-2, Spike protein, commensal  
58 gut bacteria, vaccine immunogenicity

59

60

61

62

63

64

65

## 66 Introduction

67 Antibodies are vital components of the immune system that mediate protection  
68 against infections (1). When confronting infections, the actual role of  
69 pre-existing antibody depends on the following features (2): High titers of  
70 broadly neutralizing antibodies can protect the host against infection. While,  
71 when the pre-existing antibodies are non-neutralizing or with only a narrow  
72 neutralizing spectrum, hosts may not be sterilely protected or only be protected  
73 against specific serotypes of viruses. In addition to defending hosts against  
74 infections, pre-existing antibodies can also impact host immune responses  
75 upon infection or vaccination (3-5), which is best exemplified by the  
76 observations showing that pre-existing antibodies shaped the recall immune  
77 responses against influenza (6, 7).

78 For most occasions, pre-existing antibodies in adults derive from previous  
79 infection or vaccination except some “naturally” produced, poly-reactive  
80 antibodies (2, 8). When encountering a newly emerged or mutated virus,  
81 cross-reactive antibodies induced by previously occurred, phylogenetically  
82 closely related viruses constitute the main body of the pre-existing  
83 cross-reactive antibodies. The effect of this kind of pre-existing antibodies has  
84 been extensively investigated especially for infections of influenza (3, 7, 9) and  
85 flaviviruses (10-12). Of note, previous infection by phylogenetically similar  
86 viruses is not the sole source of pre-existing cross-reactive antibodies, as it  
87 has been clearly clarified that pre-existing antibodies against HIV-1 gp41 may  
88 stem from exposures to certain commensal gut bacteria (13-15). Besides,  
89 autoimmune diseases caused by cross-reactivities between microbial and  
90 self-antigens also implied that commensal gut bacteria represent important  
91 sources of cross-reactive antibodies (16-19).

92 Pre-existing antibodies against SARS-CoV-2 have also been observed in  
93 uninfected healthy individuals, which are speculated to be engendered by  
94 previous exposures to human common cold coronaviruses (20-26) or  
95 SARS-CoV (27-29). Meanwhile, sequence analyses (30) and a clinical  
96 observation (31) suggest that pre-existing SARS-CoV-2 antibodies might be  
97 engendered by common human pathogens and childhood vaccination.  
98 Although these two explanations are not mutually exclusive, they both need  
99 more experimental evidence to support.

100 In this study, we found that higher levels of SARS-CoV-2 S2 protein specific

101 antibodies existed in both healthy human and naïve SPF mice. To track the  
102 potential origins of these pre-existing cross-reactive antibodies, we mapped  
103 and located a dominant linear antibody epitope on S2, which could be  
104 recognized by pre-existing antibodies from both healthy human and naïve SPF  
105 mice. Monoclonal antibodies against this linear epitope were isolated from  
106 naïve SPF mice and proved to cross-react with commensal gut bacteria  
107 collected from both healthy human and naïve SPF mouse. Moreover, despite  
108 having been discussed iteratively (32, 33), the influences of pre-existing  
109 cross-reactive immunities on COVID-19 responses have not been clarified.  
110 Here we showed that high levels of pre-existing antibodies did not impair the  
111 immunogenicity of a candidate DNA vaccine encoding SARS-CoV-2 spike  
112 protein. On the contrary, mice with high levels of pre-existing antibodies  
113 mounted stronger S2 specific binding antibody responses compared with mice  
114 with low levels of pre-existing antibodies after immunization with a candidate  
115 DNA vaccine. Meanwhile, S1 specific T cell and binding antibody responses  
116 also tended to be stronger in mice with high levels of pre-existing antibodies,  
117 although no statistical significance was reached.

118

## 119 **Results**

### 120 **Pre-existing antibodies recognizing a dominant linear epitope on** 121 **SARS-CoV-2 S2 protein were detected in both human and mice**

122 Pre-existing antibodies cross-react with SARS-CoV-2 S protein have been  
123 found in uninfected individuals by multiple previous studies (22, 25, 26, 34). It  
124 was postulated that the pre-existing immunities against SARS-CoV-2 might be  
125 induced by previous exposure to seasonal human coronaviruses (22, 30, 32,  
126 33, 35). However, contradictory evidence suggested that human common cold  
127 coronavirus infection did not necessarily induce antibodies cross-reactive with  
128 SARS-CoV-2 spike protein (28, 36, 37). In addition to this hypothesis, an  
129 alternative explanation suggested that the cross-reactive immunities to  
130 SARS-CoV-2 might derive from other common human pathogens and  
131 vaccines (38).

132 To track the origins of the pre-existing cross-reactive antibodies to  
133 SARS-CoV-2 spike protein, in this study, we first measured the levels of  
134 pre-existing S protein specific antibodies in healthy human individuals and  
135 SPF mice. Our data showed that the cross-reactive antibody responses

136 against S2 were significantly stronger than those against S1 in plasma  
137 samples of healthy human collected both pre (2016 cohort) and post (2020  
138 cohort) the outbreak of COVID-19 pandemic (Fig.1A and 1B). More strikingly,  
139 our data showed that binding antibodies targeting S2 could also be detected in  
140 two strains of naïve SPF mice (Fig. 1C and 1D). And this finding was further  
141 confirmed by Western-blotting (WB) assays, which showed that mouse sera  
142 with high ELISA-detected OD values (Fig. 2A) bound specifically with purified  
143 S2 while not S1 (Fig. 2B). Quite interestingly, the WB results indicated that  
144 cross-reactive antibodies against S2 also existed in the serum of a mouse  
145 (#487) with no detectable binding signal in the S2 ELISA assay (Fig. 2A and  
146 2B). We next performed linear antibody epitope mapping using an in-house  
147 developed method of peptide competition ELISA. Our data showed that a  
148 single peptide (P144, aa1145-aa1162, 18 mer) accounted for most of the  
149 observed pre-existing antibody responses towards S2 in mice (Supplementary  
150 Figure 1). Via employing a series of truncated peptides based on P144, we  
151 determined the minimal range of this epitope  
152 (1147-SFKEELDKYFKNHT-1160), which locates on the connector domain  
153 (adjacent to the N-terminal of HR2 domain) (Fig. 2C). We also proved that  
154 antibodies recognizing this epitope widely existed in both healthy human and  
155 naïve SPF mice using the competitive ELISA assay (Fig.3).

156

### 157 **The P144 specific antibody responses were engendered by exposures to** 158 **certain commensal gut bacteria**

159 To explore the potential origins of the pre-existed P144 specific antibodies, we  
160 first performed phylogenetic analyses among SARS-CoV-2 and other human  
161 coronaviruses. The results showed that the aa sequence of P144 was highly  
162 conserved among SARS-CoV-2 variants and SARS-CoV, while the similarities  
163 between P144 and MERS-CoV or seasonal human coronaviruses were  
164 relatively low, especially within the range of predicted antibody binding epitope  
165 (boxed fragment) (Supplementary Figure 2). The possibility of coronavirus  
166 infection in our SPF-mouse colonies was excluded by serum screening tests  
167 using commercialized mouse hepatitis virus (MHV) antigen and antibody  
168 detection kits (Data not shown).

169 Subsequently, to investigate whether environmental factors contribute to the  
170 induction of these S2 cross-reactive antibodies, we compared the levels of

171 pre-existing S2 binding antibodies between mice housed in SPF condition and  
172 mice maintained in a sterile isolation pack. Our data showed that the levels of  
173 pre-existing S2 binding antibodies were significantly higher in SPF mice  
174 (Figure 4A). Through metagenomic sequencing, we further demonstrated that  
175 the compositions of commensal gut bacteria were significantly different  
176 between mice housed in SPF condition and mice maintained in the sterile  
177 isolation pack (Supplementary Figure 3A). The abundance of bacteroidaceae,  
178 prevotellaceae and parabacteroides increased significantly in the commensal  
179 gut bacteria of SPF mice (Figure 4B). Moreover, flowcytometry assays  
180 indicated that the frequencies of S2 specific B cells (CD3<sup>-</sup>S2<sup>+</sup>CD19<sup>+</sup>) in  
181 mesenteric lymph nodes were significantly higher than those in spleen  
182 (Supplementary Figure 3B). To further clarify the role of fecal microbiota in the  
183 induction of S2 cross-reactive antibodies, mice from isolation pack were  
184 transplanted with fecal bacteria prepared from SPF mice (Figure 4C). We  
185 found that P144 specific antibodies significantly increased after fecal  
186 microbiota transplantation (FMT) (Figure 4D). These results collectively  
187 suggested that the S2 cross-reactive antibodies might be induced by  
188 exposures to certain microbial antigens.

189

### 190 **P144 specific monoclonal antibodies reacted with commensal gut** 191 **bacteria from both human and mouse and showed limited neutralizing** 192 **activities**

193 To probe the potential antigens that might induce the P144 binding antibodies,  
194 we isolated 6 mAbs from two naïve SPF mice (one C57BL/6J mouse and one  
195 BALB/c mouse) with high levels of pre-existing S2 specific antibody responses.  
196 Five of these mAbs recognized P144 solely, while one mAb (clone M3) bound  
197 with P144 and P103 simultaneously (Supplementary Figure 4B). Results of  
198 competitive ELISA showed that the minimal epitopes varied slightly among the  
199 five P144 specific mAbs, especially at the C-terminal of P144 (Supplementary  
200 Figure 4A). The neutralizing potentials of these isolated monoclonal antibodies  
201 were evaluated using a pseudo virus-based neutralization assay. Our results  
202 showed that these monoclonal antibodies exhibited limited neutralizing activity  
203 against 5 major SARS-CoV-2 variants (Supplementary Figure 5). Of note, G18  
204 neutralized the Indian strain (B.1.617) by 31%; F5 neutralized the UK strain  
205 (B.1.1.7) and the South African strain (B.1.351) by around 20%; G13

206 neutralized the South African strain (B.1.351) by nearly 20% ([Supplementary](#)  
207 [Figure 5](#)).

208 To prove the cross-reactivities between S2 and commensal gut microbial  
209 antigens, whole cell lysates (WCL) of mouse and human commensal gut  
210 bacteria were prepared and used as antigens for Western blotting assays,  
211 respectively. As shown in [Figure 5A](#), specific bindings with the WCL of mixed  
212 fecal bacteria prepared from mice either with low levels of pre-existing  
213 antibodies (L) or with high levels of pre-existing antibodies (H) could be clearly  
214 visualized for each isolated mAbs. It was noteworthy that all mAbs except E10  
215 strongly recognized a band around 180KD in the sample from mice with high  
216 pre-existing antibody responses. E10 predominantly recognized a band  
217 around 55KD in both samples, while stronger binding with the sample from  
218 mice with high pre-existing antibody responses could be visually observed  
219 ([Figure 5A](#)). Among the six mAbs, F5 showed the most diverse binding  
220 compacity. In addition to the band around 180KD, F5 bound with a band  
221 around 55KD (similar with E10) and a band between 40KD-55KD ([Figure 5A](#)).  
222 In comparison with the WB results of mouse samples, the recognized bands  
223 were less consistent across different human fecal bacteria samples ([Figure](#)  
224 [5B](#)), presumably due to the individual to individual variation of gut microbiota  
225 composition. We found that a band around 70KD was recognized by most  
226 mAbs in 4 (lanes 1, 5, 6, 7) out of 7 samples and a band between 50KD-70KD  
227 was recognized by all mAbs in 3 (Lanes 2, 3, 7) out 7 samples. Besides, our  
228 data showed that the recognition pattern of each sample was largely  
229 consistent across different mAbs ([Figure 5B](#)).

230 Proteins corresponding to specifically recognized bands were excised from  
231 Coomassie blue stained gels and analyzed by the mass spectrometry. For the  
232 mouse fecal bacteria samples, protein bands with molecular weights around  
233 180KD, 100KD, 55KD-70KD and 40KD-55KD (indicated by arrows in [Figure](#)  
234 [5A](#), panel F5) were selected. For human fecal bacteria samples, protein bands  
235 with molecular weights around 50KD-70KD, 70KD and 70KD-100KD  
236 (indicated by arrows in [Figure 5B](#), panel F5) were selected. The lists of  
237 proteins identified in mouse and human samples were shown in [Table 2](#) and  
238 [Table 3](#), respectively. Proteins with molecular weights corresponding  
239 approximately to the excised protein bands were identified for both human and  
240 mouse fecal bacteria samples. Of note, multiple proteins within the theoretical

241 MW range of 58KD to 60KD were found to be identical between mouse and  
242 human samples, which included Fumarate hydratase class I (Accession#  
243 P14407), Formate-tetrahydrofolate ligase OS (Accession# Q189R2),  
244 Phosphoenolpyruvate carboxykinase (ATP) OS (Accession# C4ZBL1 and  
245 A6LFQ4) and 60 kDa chaperonin OS (Accession# A0Q2T1). To verify the  
246 cross-reactivity of the proteins detected by LC-MS, we selected *E. coli* (DH5 $\alpha$   
247 strain) as a representative target because *E. coli* derived Fumarate hydratase  
248 class I (Accession# P14407) were found in both human and mouse fecal  
249 bacteria samples. The result of WB assay showed that the P144 specific mAb  
250 (clone F5) recognized multiple bands with MWs consistent with *E. coli* proteins  
251 identified by LC-MS (Supplementary Figure 6).

252

### 253 **Pre-existing S2 cross-reactive antibodies impacted specific immunities** 254 **induced by a candidate COVID-19 DNA vaccine in mice**

255 Pre-existing antibodies has been shown to be able to shape the recall immune  
256 responses upon influenza infection and vaccination (6). And the concern about  
257 how the pre-existing immunities may influence the effect of a SARS-CoV-2  
258 vaccine has also attracted lots of attention (33). To investigate the impact of  
259 the pre-existing P144 antibodies on the immunogenicity of a candidate DNA  
260 vaccine, 18 BALB/c mice were divided into 3 groups according to their levels of  
261 pre-existing S2 binding antibodies and immunized with a DNA vaccine  
262 encoding the full length of SARS-CoV-2 S protein (Figure 6A and 6B). Our data  
263 showed that mice with high levels of pre-existing S2 binding antibodies  
264 mounted significantly higher S2 binding antibody responses after vaccination  
265 compared to mice with low or moderate levels of pre-existing S2 binding  
266 antibodies (Figure 6C). More specifically, the average level of P144 specific  
267 antibody responses was also stronger in mice with high levels of pre-existing  
268 S2 binding antibodies than mice with low levels of pre-existing S2 binding  
269 antibodies (Figure 6D and 6E). By comparison, both the S1 binding antibody  
270 and the neutralizing antibody titers did not significantly differ among all groups,  
271 despite that mice with moderate or high levels of pre-existing antibodies  
272 tended to mount higher average titer of S1 binding antibodies (Figure 6F and  
273 6G). Mice without vaccination showed neither obvious S1 binding antibody  
274 response nor neutralizing activity (Data not shown). We further investigated  
275 the influence of pre-existing antibodies on humoral immune responses in



276 mouse respiratory tract after vaccination. And our data showed that the levels  
277 of S1 specific IgG in BALF were similar among the three groups after DNA  
278 vaccination (Figure 7A), while the average level of S2 specific IgG in BALF  
279 from mice with high pre-existing S2 binding antibodies was significantly higher  
280 than those from mice with low pre-existing antibodies (Figure 7B). S protein  
281 specific IgA response did not increase significantly after vaccination as  
282 compared with unvaccinated group (Figure 7C and 7D).

283 As most pre-existing antibodies in naïve SPF mice recognized P144 (Figure  
284 2C and Supplementary Figure 1), we delineated the impact of pre-existing  
285 antibody on the epitope recognition after vaccination. Our results showed that  
286 the minimum epitope recognition pattern by the sera of mice with high levels of  
287 pre-existing antibodies remained unchanged after vaccination (Figure 8).  
288 Whereas the minimum epitope recognized by the sera of mice with moderate  
289 and low levels of pre-existing antibody responses altered at either the  
290 N-terminal or both terminals of P144 (Figure 8).

291 In addition to antibody measurement, we compared S protein specific T cell  
292 responses among the three groups as well (Figure 9A). The results showed  
293 that the candidate DNA vaccine elicited robust S protein specific T cell  
294 responses in all groups (Figure 9). Although no statistical significance was  
295 reached, interesting trends were observed: First, mice with high levels of  
296 pre-existing S2 binding antibodies tended to mount relatively higher S1  
297 specific cellular immune responses (Figure 9B, 9C and 9D); second, as  
298 measured by the total responses of IL-6, IL-2 and TNF- $\alpha$ , mice with high levels  
299 of pre-existing antibodies tended to mount stronger T cell responses against  
300 S1 while lower responses against S2 (Figure 9C and 9D). Mice without  
301 vaccination showed no S protein specific T cells responses (Data not shown).

302

### 303 **Pre-existing S2 cross-reactive antibodies correlated with RBD binding** 304 **antibody responses after two-dose inactivated SARS-CoV-2 vaccination**

305 To investigate how the pre-existing cross-reactive antibodies may influence the  
306 COVID-19 vaccine induced immunity, peripheral blood samples were collected  
307 from 28 healthy individuals who received two doses of an inactivated  
308 SARS-CoV-2 vaccine (Fig.10A). Correlation analyses showed that the levels  
309 of pre-existing P144 and S2 binding antibodies were significantly associated  
310 with RBD binding antibody titers at 14 days after immunization (Fig.10 B and

311 [10E](#)). Additionally, although not statistically significant, the pre-existing P144  
312 binding antibody levels tended to correlate positively with neutralizing antibody  
313 responses after vaccination ( $P=0.0946$ ) ([Fig.10D](#)).

314

## 315 **Discussion**

316 The origins of pre-existing cross-reactive immunities against SARS-CoV-2  
317 have been investigated vigorously since the outbreak of the pandemic ([39](#)).  
318 Accumulating data suggest that cross-reactive T cells ([33](#), [40-43](#)) in  
319 SARS-CoV-2 unexposed human might be induced by previous infections of  
320 other hCoVs. While the origins of pre-existing cross-reactive antibodies could  
321 not be completely explained by previous infections of other coronaviruses, as  
322 recent studies revealed that the magnitude of antibody responses to  
323 SARS-CoV-2 S protein in the sera of patients with COVID-19 was not related  
324 to HCoVs' S titers ([44](#)) and immunization with coronaviruses OC43 did not  
325 induce significant SARS-CoV-2 S protein cross-reactive antibodies in mice.  
326 Moreover, it has also been observed that SARS-CoV-2 S protein specific  
327 binding antibody responses were weak in SARS-CoV-2 unexposed individuals  
328 with obvious binding antibody responses against S proteins of common cold  
329 hCoVs ([45](#), [46](#)).

330 To track the potential origins of the pre-existed cross-reactive antibodies  
331 targeting SARS-CoV-2 spike protein, in this study, we first screened the  
332 cross-reactive antibody responses in SARS-CoV-2 unexposed human plasma  
333 collected in 2020 and 2016, respectively. In both cohorts, we found that the  
334 magnitudes of S2 binding antibodies were significantly higher than those of S1  
335 binding antibodies. This finding is consistent with previous studies showing  
336 that pre-existing S2 cross-reactive antibody responses are stronger than S1  
337 cross-reactive antibody responses in SARS-CoV-2 unexposed individuals ([44](#),  
338 [47](#), [48](#)). Since S2 cross-reactive antibody responses have also been observed  
339 in unexposed animals ([44](#)), we continued to screen the cross-reactive antibody  
340 responses in two strains of naïve SPF mice. Our data showed that the OD  
341 values of S2 cross-reactive antibodies were significantly higher than those of  
342 S1 cross-reactive antibodies in naïve BALB/c and C57BL/6 mice. Detections of  
343 mouse sera collected from another two independent SPF animal facilities  
344 confirmed this finding ([Data not shown](#)). We also tried to detect the  
345 SARS-CoV-2 S protein specific T cells responses in mice with high

346 pre-existing S2 cross-reactive antibodies using the IFN- $\gamma$  ELISPOT assay,  
347 which showed that there was no pre-existing cross-reactive T cell response.  
348 To facilitate the search of potential antigens that induced the cross-reactive  
349 antibodies, we identified a dominant antibody epitope (P144) through a  
350 method of competitive ELISA based linear antibody epitope mapping. P144 is  
351 located within the connector domain of S2 (aa1147-aa1160, directly N-terminal  
352 of the HR2 region). The same epitope has been predicted (38) and detected in  
353 both SARS-CoV-2 unexposed and infected individuals by multiple previous  
354 studies (22, 23, 25, 26, 32). In this study, we also detected P144 specific  
355 antibody responses in plasma of healthy individuals collected in both 2020 and  
356 2016. More interestingly, we found that the pre-existing S2 cross-reactive  
357 antibodies in mice were predominantly against the single epitope. Of note,  
358 although the aa sequence of P144 is highly conserved between SARS-CoV-2  
359 and SARS-CoV, its similarity with four seasonal hCoVs is relatively low. A  
360 recent study showed that this epitope was more frequently recognized than its  
361 homologous peptides from common cold hCoVs by antibodies in plasma of  
362 COVID-19 negative individuals (23). The above evidence implied again that  
363 the pre-existing S2 specific antibodies might not be necessarily elicited by  
364 previous common cold coronavirus infections.

365 As the pre-existing S2 binding antibodies in mice were predominantly against  
366 P144, it provided us a good chance to unveil their origins. To do so, we first  
367 labeled mouse B cells with purified S2 protein and found that the frequency of  
368 S2 specific B cells was significantly higher in mesenteric LN than in spleen,  
369 suggesting that the gastrointestinal tract might be the primary site where the  
370 cross-reactive B cells were activated. Exposure to a certain gut microbial  
371 antigen, which can promote B cell diversification and stimulate antibody  
372 production in both T-dependent and -independent ways (49), might account for  
373 the presence of the cross-reactive antibodies. To prove this hypothesis, we  
374 next compared the levels of pre-existing S2 cross-reactive antibodies between  
375 mice housed in a sterile isolation pack and mice maintained in SPF condition.  
376 Our results showed that the levels of pre-existing S2 cross-reactive antibodies  
377 were significantly higher in SPF mice. Through metagenomic sequencing, we  
378 further demonstrated that the abundance of bacteroidaceae, prevotellaceae  
379 and parabacteroides were also significantly higher in the commensal gut  
380 bacteria of SPF mice. Moreover, we found that transplantation of fecal

381 microbiota from SPF mice could induce P144 cross reactive antibodies in mice  
382 bred in the isolation pack. These evidences suggested that the S2  
383 cross-reactive antibodies could be induced by certain commensal gut bacteria.  
384 To identify the potential cross-reactive bacterial antigens, we isolated six P144  
385 specific monoclonal antibodies from a naïve BALB/c mouse and a naïve  
386 C57BL/6 mouse, respectively. All the six mAbs were confirmed to be able to  
387 bind with P144 and showed weak neutralizing capacities against five  
388 SARS-CoV-2 variants. Leveraging these mAbs, we detected the  
389 cross-reactive antigens in mouse and human fecal microbiota through WB  
390 assays. Compared with a control mouse IgG, specific bands were observed for  
391 each mAb, which proved the antibody cross-reactivities between SARS-CoV-2  
392 and commensal gut bacteria. The strongly recognized protein bands were  
393 further analyzed by LC-MS. Our data showed that cross-reactive antigens  
394 derived from bacteroides and parabacteroides were frequently identified in  
395 fecal bacteria samples of both human and mouse, which was consistent with  
396 our metagenomic sequencing data showing that the abundance of bacteroides  
397 and parabacteroides was significantly higher in the commensal gut bacteria of  
398 mice with high pre-existing S2 binding antibody levels. More intriguingly, five  
399 cross-reactive microbial antigens were identified in mouse and human fecal  
400 samples simultaneously, which implied that the S2 cross-reactive antibodies  
401 might naturally occur in different species of mammals. We also analyzed the  
402 sequence similarities between P144 and the proteins identified by LC-MS. Our  
403 results showed that most identified proteins shared varied identities with P144  
404 (40%-70%, for more than 8 residues) ([Data not shown](#)). The cross-reactive  
405 epitopes on the identified proteins could not be specified based on our current  
406 data. Besides, the neutralizing mechanism(s) of P144 specific antibodies and  
407 their potential influences on gut microbiota were not clarified in this study. We  
408 plan to look into these issues in future.

409 In parallel with tracking the initial antigens that induced the S2 cross-reactive  
410 antibodies, we investigated the impact of pre-existing antibodies on the  
411 immunogenicity of a candidate DNA vaccine as well. According to previous  
412 reports, pre-existing cross-reactive antibodies may influence the effects of  
413 different vaccines differentially ([6](#), [50](#)). In this study, we found that the  
414 pre-existing cross-reactive antibodies shaped the vaccine-induced immune  
415 responses in both mouse and human. Mice with high levels of pre-existing

416 antibodies mounted stronger S2 binding antibodies in both peripheral blood  
417 and bronchial lavage after vaccination. More interestingly, we found that the  
418 pre-existing antibody levels correlated positively with post-vaccination RBD  
419 binding antibody titers in human. These findings proved that the pre-existing  
420 S2 binding antibodies could facilitate the generation of vaccine induced  
421 antibody responses. Through epitope mapping, we observed that the  
422 pre-existing antibodies strongly restricted the minimal epitope recognition in  
423 mice with high levels of pre-existing antibodies, which suggested that the  
424 imprint effect of pre-existing cross-reactive antibodies on vaccine induced  
425 antibody responses was primarily epitope specific. In addition to antibody  
426 response, we also found that the high levels of pre-existed S2 binding  
427 antibodies tended to induce higher S1 specific T cell responses while lower S2  
428 specific T cell responses, implying that the pre-existing antibodies might  
429 change the balance between humoral versus cellular immune responses  
430 against the cross-reactive antigen. Since we did not perform the live virus  
431 challenge, it is still not clear how the pre-existing cross-reactive antibodies will  
432 impact vaccine efficacy *in vivo*. Nonetheless, as both our results and a recently  
433 published study suggested that antibodies targeting P144 epitope could  
434 neutralize SARS-CoV-2(51), we speculate that the pre-existing P144  
435 cross-reactive antibodies may have protective effect.

436 A deep understanding of pre-existing cross-reactive antibodies against  
437 SARS-CoV-2 will enable better therapeutic, diagnostic and vaccine strategies.  
438 In this study, we provided evidence showing that antibodies targeting a  
439 conserved linear epitope on S2 cross-reacted with gut microbial antigens from  
440 both human and mouse, manifesting that some of the pre-existing  
441 cross-reactive antibodies might be induced by exposure to certain commensal  
442 gut bacteria. We proved that the pre-existing S2 cross-reactive antibodies did  
443 not impair the immunogenicity of a candidate DNA vaccine in a mouse model.  
444 Further investigations into the role of P144 specific antibody after  
445 SARS-CoV-2 infection and its impact on gut microbiota might provide clues to  
446 elucidate the mechanisms underlying the gastrointestinal symptom of  
447 COVID-19 (52-54).

448

449 **Materials and methods**

450 **Ethics statement**

451 All experiments and methods were performed in accordance with relevant  
452 guidelines and regulations. Experiments using mice and samples of healthy  
453 human were approved by the Research Ethics Review Committee of the  
454 Shanghai Public Health Clinical Center Affiliated to Fudan University. The  
455 study involving 28 healthy vaccinees was reviewed and approved by the  
456 institutional ethics committee of Hubei provincial CDC, China.

457

#### 458 **Plasma samples of healthy human**

459 Two batches of plasma samples were collected from healthy individuals at the  
460 health screening clinic of Shanghai Public Health Clinical Center. A concurrent  
461 batch was collected in December 2020. All the 95 individuals enrolled in this  
462 batch reported no epidemiological link with confirmed COVID-19 patients and  
463 were confirmed to be free from any chronic or acute disease. Viral RNA tests  
464 confirmed that all individuals in this batch were free from SARS-CoV-2  
465 infection. In addition, a historical batch of 78 plasma samples from healthy  
466 individual cohort (collected in 2016) were also measured for their cross  
467 reactivities with SARS-CoV-2 S protein. Demographical information about  
468 these two cohorts was described in [Table 1](#).

469

#### 470 **Detection of SARS-CoV-2 S1 and S2 specific binding antibodies**

471 In-house enzyme-linked immunosorbent assays (ELISA) were developed to  
472 measure SARS-CoV-2 S1 and S2 specific binding antibodies. High-binding  
473 96-well EIA plates (Cat# 9018, Corning, USA) were coated with purified  
474 SARS-CoV-2 S1 (Cat# 40591-V08H, Sino Biological, China) or S2 proteins  
475 (Cat# 40590-V08B, Sino Biological, China) at a final concentration of 1µg/ml in  
476 carbonate/bi-carbonate coating buffer (30mM NaHCO<sub>3</sub>, 10mM Na<sub>2</sub>CO<sub>3</sub>, pH  
477 9.6). Subsequently, the plates were blocked with 1×PBS containing 5% milk  
478 for 1 hour at 37°C. Next, 100µl of diluted human plasma or mouse serum was  
479 added to each well. After 1-hour incubation at 37°C, the plates were washed  
480 with 1×PBS containing 0.05% Tween20 for 5 times. Then, 100µl of a HRP  
481 labeled goat anti-mouse IgG antibody (Cat# ab6759, Abcam, UK) or goat  
482 anti-mouse IgG antibody (Cat# 115-035-003, Jackson Immuno Research, USA)  
483 diluted in 1×PBS containing 5% milk were added to each well and incubated  
484 for 1 hour at 37°C. After a second round of wash, 100µl of TMB substrate  
485 reagent (Cat# MG882, MESGEN, China) was added to each well. 15 minutes

486 later, the color development was stopped by adding 100 $\mu$ l of 1M H<sub>2</sub>SO<sub>4</sub> to  
487 each well and the values of optical density at OD<sub>450nm</sub> and OD<sub>630nm</sub> were  
488 measured using 800 TS microplate reader (Cat# 800TS, Biotek, USA).

489

### 490 **Competitive ELISA**

491 According to the reference sequence of SARS-CoV-2 (Genbank accession  
492 number: NC\_045512), peptides (18-mer overlapping by 11 residues, purities >  
493 95%) encompass the full length of S protein were synthesized by GL Biochem  
494 (Shanghai, China). The experiment procedure was generally similar with the  
495 afore mentioned in-house ELISA assays, except that the diluted mouse serum  
496 or human plasma were incubated with synthesized peptides (5 $\mu$ g/ml) for 1  
497 hour at room temperature before adding into the coated EIA plates. 1 $\times$ PBS  
498 containing 0.01% DMSO (the solvent used to dissolve peptides) were used as  
499 the negative control in this assay.

500

### 501 **Antibody avidity assay**

502 Avidity of Ag-specific Ab was determined by ELISA as reported (55) with minor  
503 modifications. Briefly, plates were coated as the regular ELISA assay  
504 described above. Diluted (1:200) mouse sera were added into each well. After  
505 1-hour incubation, ELISA plates were washed with washing buffer and  
506 incubated with 1.5M NaSCN or PBS for 15 mins at room temperature and then  
507 immediately washed with washing buffer. Ab avidity index was defined as the  
508 ratio of the OD value of a sample with 1.5M NaSCN treatment versus the OD  
509 value of the same sample with PBS treatment.

510

### 511 **FACS analysis of S2 specific B cells in mice**

512 Spleen and mesenteric lymph nodes were isolated from naïve SPF mice and  
513 single-cell suspensions were freshly prepared. After counting, 1 $\times$ 10<sup>6</sup> single  
514 cells were resuspended in 100 $\mu$ l R10 (RPMI1640 containing 10% fetal bovine  
515 serum) and incubated with biotinylated S2 protein (Cat# 40590-V08B-B, Sino  
516 Biological, China) for 30 minutes at room temperature. After incubation, the  
517 cells were washed twice with 500 $\mu$ l R10. Then, the cells were incubated with  
518 the mixture of PE-anti-mouse CD19 (Cat# 152408, Biolegend, USA, 1 $\mu$ l/test),  
519 BV510-anti-mouse CD45 (Cat# 103137, Biolegend, USA, 1.25 $\mu$ l/test) and  
520 Streptavidin-IF647 (Cat# 46006, AAT Bioquest, USA, 0.2 $\mu$ l/test) at room

521 temperature for 30 minutes. After washing, the stained cells were resuspended  
522 in 200 $\mu$ l 1 $\times$ PBS and analyzed using a BD LSRFortessa™ Flow Cytometer.  
523 The data were analyzed using the FlowJo software (BD Biosciences, USA).

524

### 525 **Preparation of P144 specific monoclonal antibodies**

526 Monoclonal antibodies against P144 were prepared from one naïve BALB/c  
527 mouse and one naïve C57BL/6 mouse respectively using the hybridoma  
528 technique. Briefly, freshly isolated splenocytes were mixed and fused with  
529 SP2/0 cells at a ratio of 1:10. Hybridoma cell clones secreting P144 specific  
530 antibodies were screened by ELISA and monoclonal hybridoma cells were  
531 selected by multiple rounds of limited dilution. Selected clones of hybridoma  
532 cells were injected intraperitoneally into BALB/c $\times$ ICR hybrid mice. About 1-2  
533 weeks later, peritoneal fluid was collected, and monoclonal IgG was purified  
534 using Protein A resin. The purities of monoclonal antibodies were verified using  
535 SDS-PAGE and the antibody concentrations were determined using a BCA kit  
536 (Cat# P0012, Beyotime Biotechnology, China).

537

### 538 **Isolation of gut commensal bacteria and preparation of whole cell lysate** 539 **(WCL)**

540 About 2g of each fecal sample was suspended with 15ml sterile 1 $\times$ PBS and  
541 vortexed thoroughly to obtain uniform mixtures. After centrifugation at 200 $\times$ g  
542 for 5 min, the supernatants were collected, and the sediments were discarded.  
543 This process was repeated twice. Next, all the supernatant samples were  
544 centrifuged twice at 9000 $\times$ g for 5 min and the supernatants were discarded.  
545 The precipitated bacteria pellets were resuspended in 500 $\mu$ l of 1 $\times$ PBS  
546 (containing 1mM PMSF) and disrupted with an ultrasonic cell crusher (the  
547 probe-type sonicator, Model JY92-II; Ningbo Scientz Biotechnology Co., Ltd,  
548 China). After sonication, the samples were centrifuged at 10000rpm for 30  
549 minutes to remove the cellular debris.

550

### 551 **Western blotting**

552 WCL containing 10 $\mu$ g of total protein was separated by SDS-PAGE (10%  
553 acrylamide gels) and then transferred onto a PVDF membrane (Cat#  
554 IPVH00010, Millipore, USA) or stained with Coomassie brilliant blue. After  
555 blocking with 5% skim milk for 2h, the membrane was incubated with a P144



556 specific monoclonal antibody or a control mouse IgG at a concentration of 1  
557 µg/ml. After washing, the membrane was incubated with HRP conjugated goat  
558 anti-mouse IgG antibody (Cat # ab6759, Abcam, UK) diluted 1:5000 in TBST  
559 (Tris-buffered saline, pH 8.0, 0.05% Tween 20) containing 5% skim milk. After  
560 wash, the bands were developed with an ultra-sensitive ECL substrate (Cat#  
561 K-12045-D10, Advansta, USA). The area corresponding to the specific WB  
562 bands were excised from the gel stained with Coomassie blue and analyzed  
563 using the mass spectrometry.

564

### 565 **Mass spectrometry analysis**

566 The FASP digestion was adapted for the following procedures in Microcon  
567 PL-10 filters. After three-time buffer displacement with 8 M Urea and 100 mM  
568 Tris-HCl, pH 8.5, proteins were reduced by 10 mM DTT at 37 °C for 30 min and  
569 followed by alkylation with 30 mM iodoacetamide at 25°C for 45 min in dark.  
570 Digestion was carried out with trypsin (enzyme/protein as 1:50) at 37°C for 12  
571 h after a wash with 20% ACN and three-time buffer displacement with  
572 digestion buffer (30 mM Tris-HCl, pH 8.0). After digestion, the solution was  
573 filtrated out and the filter was washed twice with 15% ACN, and all filtrates  
574 were pooled and vacuum-dried to reach a final concentration to 1 mg/ml.  
575 LC-MS analysis was performed using a nanoflow EASYnLC 1200 system  
576 (Thermo Fisher Scientific, Odense, Denmark) coupled to an Orbitrap Fusion  
577 Lumos mass spectrometer (Thermo Fisher Scientific, Bremen, Germany). A  
578 one-column system was adopted for all analyses. Samples were analyzed on  
579 a home-made C18 analytical column (75 µm i.d. × 25 cm, ReproSil-Pur 120  
580 C18-AQ, 1.9 µm (Dr. Maisch GmbH, Germany)). The mobile phases consisted  
581 of Solution A (0.1% formic acid) and Solution B (0.1% formic acid in 80% ACN).  
582 The derivatized peptides were eluted using the following gradients: 2–5% B in  
583 2 min, 5–35% B in 100 min, 35–44% B in 6 min, 44–100% B in 3 min, 100% B  
584 for 10 min, at a flow rate of 200 nl/min. Data-dependent analysis was  
585 employed in MS analysis: The time between master scan was 3s, and  
586 fragmented in HCD mode, normalized collision energy was 30.

587

### 588 **Construction and preparation of a candidate DNA vaccine encoding** 589 **SARS-CoV-2 full length S protein**

590 The full-length s gene sequence of the reference SARS-CoV-2 strain was

591 optimized according to the preference of human codon usage and synthesized  
592 by GENEWIZ life science company (Suchow, China). The codon optimized  
593 spike gene was subcloned into a eukaryotic expression vector (pJW4303,  
594 kindly gifted by Dr. Shan Lu's Laboratory at the University of Massachusetts)  
595 (56). And the sequence of inserted gene was verified by Sanger sequencing  
596 (Sangon Biotech Co., Ltd., Shanghai, China). An EndoFree Plasmid  
597 Purification Kit (Cat#12391, Qiagen, Hilden, USA) was used to prepare the  
598 recombinant plasmid for mouse vaccination.

599

### 600 **Mouse vaccination**

601 Peripheral blood samples were collected from female adult mice and  
602 pre-existing S2 binding antibodies were measured using the previously  
603 described in-house ELISA method. According to their pre-existing S2 binding  
604 antibody levels (at 1:100 dilution of serum), the mice were divided into three  
605 groups: low ( $0.015 < OD_{450nm-630nm} \leq 0.130$ ,  $n=6$ ), moderate ( $0.130 <$   
606  $OD_{450nm-630nm} \leq 0.750$ ,  $n=6$ ) and high ( $OD_{450nm-630nm} > 0.750$ ,  $n=6$ ). All mice  
607 were immunized intramuscularly with the candidate S protein DNA vaccine  
608 (50 $\mu$ g/mouse) for three times at an interval of 2 weeks. Three weeks post the  
609 third vaccination, the mice were euthanized. Peripheral blood, bronchial lavage  
610 and spleen were collected for assays of S protein specific immune responses.

611

### 612 **Metagenomic analysis of mouse gut microbiota**

613 Stool (fecal) samples were self-collected and DNA was extracted from 250 mg  
614 of each fecal sample in duplicate. The DNA samples were separated strictly  
615 according to TIANamp Stool DNA Kit (Cat# DP328, TIANGEN, China). Then, a  
616 total amount of 1 $\mu$ g DNA per sample was used as input material for the DNA  
617 sample preparations. Sequencing libraries were generated using NEBNext®  
618 Ultra™ DNA Library Prep Kit for Illumina (NEB, USA) following manufacturer's  
619 recommendations and index codes were added to attribute sequences to each  
620 sample. Briefly, the DNA sample was fragmented by sonication to a size of  
621 350bp, then DNA fragments were end-polished, A-tailed, and ligated with the  
622 full-length adaptor for Illumina sequencing with further PCR amplification. At  
623 last, PCR products were purified (AMPure XP system) and libraries were  
624 analyzed for size distribution by Agilent 2100 Bioanalyzer and quantified using  
625 real-time PCR. The clustering of the index-coded samples was performed on a

626 cBot Cluster Generation System according to the manufacturer's instructions.  
627 After cluster generation, the library preparations were sequenced on an  
628 Illumina Novaseq 6000 platform and paired-end reads were generated.

629

### 630 **SARS-CoV-2 pseudo-virus neutralization assay**

631 VSV-backboned SARS-CoV-2 pseudo-viruses were prepared according to a  
632 reported method (57). The neutralization assay was conducted by following  
633 the previously described procedure (57, 58). Briefly, 100µl of serially diluted  
634 mice sera were added into 96-well cell culture plates. Then, 50µl of  
635 pseudo-viruses with a titer of 13000 TCID<sub>50</sub>/ml were added into each well and  
636 the plates were incubated at 37°C for 1 hour. Next, Vero cells were added into  
637 each well (2×10<sup>4</sup> cells/well) and the plates were incubated at 37°C in a  
638 humidified incubator with 5% CO<sub>2</sub>. 24 hours later, luminescence detection  
639 reagent (Bright-Glo™ Luciferase Assay System, Promega, USA) was added to  
640 each well following the manufacturer's instruction. The luminescence was  
641 measured using a luminescence microplate reader (GloMax®  
642 Navigator Microplate Luminometer, Promega, USA) within 5 minutes. The  
643 Reed-Muench method was used to calculate the virus neutralization titer.  
644 Antibody neutralization titers were presented as 50% maximal inhibitory  
645 concentration (IC<sub>50</sub>).

646

### 647 **Detections of S protein specific cellular immune responses**

648 SARS-CoV-2 S protein specific IFN-γ releases were measured using the  
649 method of enzyme-linked immunosorbent spot (ELISPOT) assays (Cat#  
650 551083, BD Bioscience, USA) according to a previously described procedure  
651 (59). Briefly, the 96-well ELISPOT plates were coated with purified anti-mouse  
652 IFN-γ monoclonal antibody overnight at 4°C. Then, the plates were blocked  
653 and 2×10<sup>5</sup> fresh splenocytes were added into each well and incubated with  
654 peptide pools for 20 hours at 37°C in a humidified incubator with 5% CO<sub>2</sub>. The  
655 final concentration for each peptide was 1µg/ml. After incubation, detecting  
656 antibody and Avidin-HRP were added sequentially. Finally, the plates were  
657 developed using the BD™ ELISPOT AEC Substrate Set (Cat#551951, BD  
658 Bioscience, USA) according to the manufacturer's manual. Spots representing  
659 IFN-γ producing cells were enumerated using an automated ELISPOT plate  
660 reader (ChampSpot III Elispot Reader, Saizhi, Beijing, China). At the same

661 time, the supernatants in the wells of ELISPOT plates were also collected for  
662 detecting secreted cytokines using a multiplexed cytokine beads array kit  
663 (Cat# 741054, Biolegend, USA).

664

### 665 **Statistical analysis**

666 All statistical analyses were performed using GraphPad Prism 8  
667 (GraphPad Software, Inc., La Jolla, CA, USA). Comparisons between two  
668 groups were conducted by the method of *t*-test. Comparisons among three or  
669 more group were done using one-way ANOVA.  $P < 0.05$  was considered as  
670 statistically significant.

671

### 672 **Acknowledgements**

673 We thank Miss Zhangyufan He from Huashan Hospital, Fudan University, for  
674 her kind help with the language polishing. This work was funded by the  
675 National Natural Science Foundation of China (Grant No. 81971559,  
676 82041010, 81971900, 31872744), National Science and Technology Major  
677 Project (Grant No. 2018ZX10731301-004, 2018ZX10302302-002 and  
678 2018ZX10301-404-002-003) and the Science and Technology Commission of  
679 Shanghai Municipality (Grant No. 20411950400).

680

### 681 **Author contributions**

682 Y.M.W., Y.X., C.Q., Z.Q.Z. and W.H.Z. designed the study. L.Q.J., S.F.W.,  
683 Y.M.W., X.X.T., Y.F.Z., J.W., X.Y.W., and J.W. conducted the experiments.  
684 Y.M.W., L.Q.J. and S.F.W. analyzed the data and drafted the manuscript.  
685 Y.M.W., Y.X., C.Q., Z.Q.Z. and W.H.Z. revised the manuscript. D.M.Y. and  
686 W.H.W. provided intellectual inputs in tackling technical challenges in tracking  
687 the potential cross-reacting antigens.

688

### 689 **Conflict of Interest**

690 The authors declare that they have no relevant conflicts of interest.

691

### 692 **Data availability**

693 The data of metagenomic analysis of gut microbiota has been deposited to the

694 NCBI Sequence Read Archive (SRA) database with the accession number  
695 PRJNA747837.

696

## 697 **References**

- 698 1. Lu LL, Suscovich TJ, Fortune SM, Alter G. Beyond binding: antibody effector functions in  
699 infectious diseases. *Nature reviews Immunology*. 2018;18(1):46-61.
- 700 2. Warter L, Appanna R, Fink K. Human poly- and cross-reactive anti-viral antibodies and their  
701 impact on protection and pathology. *Immunologic research*. 2012;53(1-3):148-61.
- 702 3. Cobey S, Hensley SE. Immune history and influenza virus susceptibility. *Current opinion in*  
703 *virology*. 2017;22:105-11.
- 704 4. Mok DZL, Chan KR. The Effects of Pre-Existing Antibodies on Live-Attenuated Viral Vaccines.  
705 *Viruses*. 2020;12(5).
- 706 5. Zimmermann P, Curtis N. Factors That Influence the Immune Response to Vaccination. *Clinical*  
707 *microbiology reviews*. 2019;32(2).
- 708 6. Dugan HL, Guthmiller JJ, Arevalo P, Huang M, Chen YQ, Neu KE, et al. Preexisting immunity  
709 shapes distinct antibody landscapes after influenza virus infection and vaccination in humans. *Science*  
710 *translational medicine*. 2020;12(573).
- 711 7. Zhang A, Stacey HD, Mullarkey CE, Miller MS. Original Antigenic Sin: How First Exposure  
712 Shapes Lifelong Anti-Influenza Virus Immune Responses. *Journal of immunology (Baltimore, Md :*  
713 *1950)*. 2019;202(2):335-40.
- 714 8. Boes M. Role of natural and immune IgM antibodies in immune responses. *Molecular*  
715 *immunology*. 2000;37(18):1141-9.
- 716 9. Auladell M, Jia X, Hensen L, Chua B, Fox A, Nguyen THO, et al. Recalling the Future:  
717 Immunological Memory Toward Unpredictable Influenza Viruses. *Frontiers in immunology*.  
718 2019;10:1400.
- 719 10. St. John AL, Rathore APS. Adaptive immune responses to primary and secondary dengue virus  
720 infections. *Nature Reviews Immunology*. 2019;19(4):218-30.
- 721 11. Izmirly AM, Alturki SO, Alturki SO, Connors J, Haddad EK. Challenges in Dengue Vaccines  
722 Development: Pre-existing Infections and Cross-Reactivity. 2020;11(1055).
- 723 12. Andrade P, Gimblet-Ochieng C, Modirian F, Collins M, Cárdenas M, Katzelnick LC, et al. Impact  
724 of pre-existing dengue immunity on human antibody and memory B cell responses to Zika. *Nature*  
725 *Communications*. 2019;10(1):938.
- 726 13. Liao HX, Chen X, Munshaw S, Zhang R, Marshall DJ, Vandergrift N, et al. Initial antibodies  
727 binding to HIV-1 gp41 in acutely infected subjects are polyreactive and highly mutated. *The Journal of*  
728 *experimental medicine*. 2011;208(11):2237-49.
- 729 14. Bonsignori M, Liao HX, Gao F, Williams WB, Alam SM, Montefiori DC, et al. Antibody-virus  
730 co-evolution in HIV infection: paths for HIV vaccine development. *Immunological reviews*.  
731 2017;275(1):145-60.
- 732 15. Williams WB, Liao HX, Moody MA, Kepler TB, Alam SM, Gao F, et al. HIV-1 VACCINES.  
733 Diversion of HIV-1 vaccine-induced immunity by gp41-microbiota cross-reactive antibodies. *Science*  
734 (New York, NY). 2015;349(6249):aab1253.
- 735 16. Zitvogel L, Ayyoub M, Routy B, Kroemer G. Microbiome and Anticancer Immunosurveillance.  
736 *Cell*. 2016;165(2):276-87.

- 737 17. Leng Q, Tarbe M, Long Q, Wang F. Pre-existing heterologous T-cell immunity and neoantigen  
738 immunogenicity. *Clinical & translational immunology*. 2020;9(3):e01111.
- 739 18. Sioud M. T-cell cross-reactivity may explain the large variation in how cancer patients respond to  
740 checkpoint inhibitors. *Scandinavian journal of immunology*. 2018;87(3).
- 741 19. Rose NR. Negative selection, epitope mimicry and autoimmunity. *Current opinion in immunology*.  
742 2017;49:51-5.
- 743 20. Anderson EM, Goodwin EC, Verma A, Arevalo CP, Bolton MJ, Weirick ME, et al. Seasonal  
744 human coronavirus antibodies are boosted upon SARS-CoV-2 infection but not associated with  
745 protection. *Cell*. 2021.
- 746 21. Galipeau Y, Greig M, Liu G, Driedger M, Langlois MA. Humoral Responses and Serological  
747 Assays in SARS-CoV-2 Infections. *Frontiers in immunology*. 2020;11:610688.
- 748 22. Klompus S, Leviatan S, Vogl T, Kalka IN, Godneva A, Shinar E, et al. Cross-reactive antibody  
749 responses against SARS-CoV-2 and seasonal common cold coronaviruses. 2020:2020.09.01.20182220.
- 750 23. Shrock E, Fujimura E, Kula T, Timms RT, Lee IH, Leng Y, et al. Viral epitope profiling of  
751 COVID-19 patients reveals cross-reactivity and correlates of severity. *Science (New York, NY)*.  
752 2020;370(6520).
- 753 24. Ortega N, Ribes M, Vidal M, Rubio R, Aguilar R, Williams S, et al. Seven-month kinetics of  
754 SARS-CoV-2 antibodies and protective role of pre-existing antibodies to seasonal human  
755 coronaviruses on COVID-19. 2021:2021.02.22.21252150.
- 756 25. Ladner JT, Henson SN, Boyle AS, Engelbrektsen AL, Fink ZW, Rahee F, et al. Epitope-resolved  
757 profiling of the SARS-CoV-2 antibody response identifies cross-reactivity with endemic human  
758 coronaviruses. *Cell reports Medicine*. 2021;2(1):100189.
- 759 26. Ng KW, Faulkner N, Cornish GH, Rosa A, Harvey R, Hussain S, et al. Preexisting and de novo  
760 humoral immunity to SARS-CoV-2 in humans. *Science (New York, NY)*. 2020;370(6522):1339-43.
- 761 27. Yang R, Lan J, Huang B, A R, Lu M, Wang W, et al. Lack of antibody-mediated cross-protection  
762 between SARS-CoV-2 and SARS-CoV infections. *EBioMedicine*. 2020;58:102890.
- 763 28. Lv H, Wu NC, Tsang OT, Yuan M, Perera R, Leung WS, et al. Cross-reactive Antibody Response  
764 between SARS-CoV-2 and SARS-CoV Infections. *Cell reports*. 2020;31(9):107725.
- 765 29. Zhu Y, Yu D, Han Y, Yan H, Chong H, Ren L, et al. Cross-reactive neutralization of SARS-CoV-2  
766 by serum antibodies from recovered SARS patients and immunized animals. *Science advances*.  
767 2020;6(45).
- 768 30. Lipsitch M, Grad YH, Sette A, Crotty S. Cross-reactive memory T cells and herd immunity to  
769 SARS-CoV-2. *Nature reviews Immunology*. 2020;20(11):709-13.
- 770 31. Sumbul B, Sumbul HE, Okyay RA, Gülümsek E, Şahin AR, Boral B, et al. Is there a link between  
771 pre-existing antibodies acquired due to childhood vaccinations or past infections and COVID-19? A  
772 case control study. *PeerJ*. 2021;9:e10910.
- 773 32. Majdoubi A, Michalski C, O'Connell SE, Dada S, Narpala SR, Gelinis JP, et al. A majority of  
774 uninfected adults show pre-existing antibody reactivity against SARS-CoV-2. *JCI insight*. 2021.
- 775 33. Sette A, Crotty S. Pre-existing immunity to SARS-CoV-2: the knowns and unknowns. *Nature*  
776 *reviews Immunology*. 2020;20(8):457-8.
- 777 34. Tso FY, Lidenge SJ, Peña PB, Clegg AA, Ngowi JR, Mwaiselage J, et al. High prevalence of  
778 pre-existing serological cross-reactivity against severe acute respiratory syndrome coronavirus-2  
779 (SARS-CoV-2) in sub-Saharan Africa. *International journal of infectious diseases : IJID : official*  
780 *publication of the International Society for Infectious Diseases*. 2021;102:577-83.

- 781 35. Lee CH, Pinho MP, Buckley PR, Woodhouse IB, Ogg G, Simmons A, et al. Potential CD8+ T Cell  
782 Cross-Reactivity Against SARS-CoV-2 Conferred by Other Coronavirus Strains. *Frontiers in*  
783 *immunology*. 2020;11:579480.
- 784 36. Freeman B, Lester S, Mills L, Rasheed MAU, Moye S, Abiona O, et al. Validation of a  
785 SARS-CoV-2 spike protein ELISA for use in contact investigations and sero-surveillance.  
786 2020:2020.04.24.057323.
- 787 37. Post N, Eddy D, Huntley C, van Schalkwyk MCI, Shrotri M, Leeman D, et al. Antibody response  
788 to SARS-CoV-2 infection in humans: A systematic review. *PloS one*. 2020;15(12):e0244126.
- 789 38. Reche PA. Potential Cross-Reactive Immunity to SARS-CoV-2 From Common Human Pathogens  
790 and Vaccines. *Frontiers in immunology*. 2020;11:586984.
- 791 39. Doshi P. Covid-19: Do many people have pre-existing immunity? 2020;370:m3563.
- 792 40. Steiner S, Sotzny F, Bauer S, Na I-K, Schmueck-Henneresse M, Corman VM, et al. HCoV- and  
793 SARS-CoV-2 Cross-Reactive T Cells in COVID Patients. 2020;11(3347).
- 794 41. Mateus J, Grifoni A, Tarke A, Sidney J, Ramirez SI, Dan JM, et al. Selective and cross-reactive  
795 SARS-CoV-2 T cell epitopes in unexposed humans. 2020;370(6512):89-94.
- 796 42. Grifoni A, Weiskopf D, Ramirez SI, Mateus J, Dan JM, Moderbacher CR, et al. Targets of T Cell  
797 Responses to SARS-CoV-2 Coronavirus in Humans with COVID-19 Disease and Unexposed  
798 Individuals. *Cell*. 2020;181(7):1489-501.e15.
- 799 43. Braun J, Loyal L, Frensch M, Wendisch D, Georg P, Kurth F, et al. SARS-CoV-2-reactive T cells  
800 in healthy donors and patients with COVID-19. *Nature*. 2020;587(7833):270-4.
- 801 44. Kim H, Seiler P, Jones JC, Ridout G, Camp KP, Fabrizio TP, et al. Antibody Responses to  
802 SARS-CoV-2 Antigens in Humans and Animals. *Vaccines*. 2020;8(4).
- 803 45. Anderson EM, Goodwin EC, Verma A, Arevalo CP, Bolton MJ, Weirick ME, et al. Seasonal  
804 human coronavirus antibodies are boosted upon SARS-CoV-2 infection but not associated with  
805 protection. *Cell*. 2021;184(7):1858-64.e10.
- 806 46. Song G, He W-t, Callaghan S, Anzanello F, Huang D, Ricketts J, et al. Cross-reactive serum and  
807 memory B-cell responses to spike protein in SARS-CoV-2 and endemic coronavirus infection. *Nature*  
808 *Communications*. 2021;12(1):2938.
- 809 47. Fraley E, LeMaster C, Banerjee D, Khanal S, Selvarangan R, Bradley T. Cross-reactive antibody  
810 immunity against SARS-CoV-2 in children and adults. *Cellular & molecular immunology*. 2021:1-3.
- 811 48. Nguyen-Contant P, Embong AK, Kanagaiah P, Chaves FA, Yang H, Branche AR, et al. S  
812 Protein-Reactive IgG and Memory B Cell Production after Human SARS-CoV-2 Infection Includes  
813 Broad Reactivity to the S2 Subunit. *mBio*. 2020;11(5).
- 814 49. Zhao Q, Elson CO. Adaptive immune education by gut microbiota antigens. *Immunology*.  
815 2018;154(1):28-37.
- 816 50. Bradt V, Malafa S, von Braun A, Jarmer J, Tsouchnikas G, Medits I, et al. Pre-existing yellow  
817 fever immunity impairs and modulates the antibody response to tick-borne encephalitis vaccination.  
818 *NPJ vaccines*. 2019;4:38.
- 819 51. Pinto D, Sauer MM, Czudnochowski N, Low JS, Tortorici MA, Housley MP, et al. Broad  
820 betacoronavirus neutralization by a stem helix-specific human antibody. *Science (New York, NY)*.  
821 2021.
- 822 52. Lee IC, Huo TI, Huang YH. Gastrointestinal and liver manifestations in patients with COVID-19.  
823 *Journal of the Chinese Medical Association : JCMSA*. 2020;83(6):521-3.
- 824 53. Jin X, Lian JS, Hu JH, Gao J, Zheng L, Zhang YM, et al. Epidemiological, clinical and virological

- 825 characteristics of 74 cases of coronavirus-infected disease 2019 (COVID-19) with gastrointestinal  
826 symptoms. *Gut*. 2020;69(6):1002-9.
- 827 54. Mao R, Qiu Y, He JS, Tan JY, Li XH, Liang J, et al. Manifestations and prognosis of  
828 gastrointestinal and liver involvement in patients with COVID-19: a systematic review and  
829 meta-analysis. *The lancet Gastroenterology & hepatology*. 2020;5(7):667-78.
- 830 55. Fan W, Wan Y, Li Q. Interleukin-21 enhances the antibody avidity elicited by DNA prime and  
831 MVA boost vaccine. *Cytokine*. 2020;125:154814.
- 832 56. Lu S, Manning S, Arthos J. Antigen engineering in DNA immunization. *Methods in molecular  
833 medicine*. 2000;29:355-74.
- 834 57. Nie J, Li Q, Wu J, Zhao C, Hao H, Liu H, et al. Establishment and validation of a pseudovirus  
835 neutralization assay for SARS-CoV-2. *Emerging microbes & infections*. 2020;9(1):680-6.
- 836 58. Li Q, Wu J, Nie J, Zhang L, Hao H, Liu S, et al. The Impact of Mutations in SARS-CoV-2 Spike  
837 on Viral Infectivity and Antigenicity. *Cell*. 2020;182(5):1284-94.e9.
- 838 59. Ren Y, Wang N, Hu W, Zhang X, Xu J, Wan Y. Successive site translocating inoculation  
839 potentiates DNA/recombinant vaccinia vaccination. *Scientific reports*. 2015;5:18099.

840  
841  
842  
843  
844  
845  
846  
847  
848  
849  
850  
851  
852  
853  
854  
855  
856  
857  
858  
859  
860  
861  
862  
863  
864  
865  
866  
867  
868



869 **Figure legends**

870

871 **Figure 1. Pre-existing cross-reactive antibodies against SARS-CoV-2 S**  
872 **protein observed in both healthy human and naïve SPF mice**  
873 **predominantly targeted S2**

874 The pre-existing cross-reactive antibodies against S1 and S2 were measured  
875 using an in-house ELISA (Sample dilution factor: 100). **(A)** Plasma samples of  
876 healthy individuals collected in 2020 (n=95). **(B)** Plasma samples of healthy  
877 individuals collected in 2016 (n=78). **(C)** Sera of naïve C56BL/6J mice (n=12).  
878 **(D)** Sera of naïve BALB/c mice (n=101). The dot lines showed the threshold of  
879 background (3 folds of the background OD). Statistical analyses were  
880 performed using the method of paired t-test.

881

882 **Figure 2 The pre-existing S protein binding antibodies in naïve SPF mice**  
883 **recognized S2 exclusively and a dominant linear antibody epitope was**  
884 **identified on the connector domain**

885 The pre-existing S1 and S2 cross-reactive antibody levels of 6 mice selected  
886 for WB assays were shown in **(A)**. **(B)** Western-blotting assays of pre-existing  
887 cross-reactive antibodies for 6 selected mouse serum samples. The purities of  
888 S1 and S2 proteins were shown by coomassie blue staining. **(C)** The minimal  
889 epitope of P144 was defined using a method of competitive ELISA (Data  
890 shown as mean±SD, n=5). Purified S2 protein was used as the coating antigen  
891 and truncated peptides derived from P144 were used as competitors. The  
892 decreases of competitive inhibition reflected the necessity of each amino acid  
893 for the epitope recognition. Statistical differences among groups was analyzed  
894 using One-way ANOVA. \*\*\*\*, P<0.0001. M: molecular weight markers; SP,  
895 signal peptide; RBD, receptor-binding domain; FP, fusion peptide; HR, heptad  
896 repeat; CH, central helix; CD, connector domain; TM, transmembrane domain;  
897 CT, cytoplasmic tail.

898

899 **Figure 3 Cross-reactive antibodies recognizing epitope P144 widely**  
900 **existed in both healthy human and naïve SPF mice**

901 P144 specific binding antibodies were detected using a method of competitive  
902 ELISA. **(A)** For the detections of P144 specific binding antibodies in naïve SPF  
903 mice, purified S2 protein was used as the coating antigen and P144 peptide

904 was used as the competitor. **(B)** For the detections of P144 specific binding  
905 antibodies in healthy individuals, purified BSA-P144 conjugate was used as  
906 the coating antigen and P144 peptide was used as the competitor. In both  
907 experiments, the reduction of OD value reflected the presence of P144 binding  
908 antibodies.

909

910 **Figure 4 The generation of the pre-existing S2 cross-reactive antibodies**  
911 **were associated with commensal gut microbiota**

912 **(A)** Comparison of the levels of S2 specific pre-existing antibodies between  
913 naïve mice maintained under SPF condition and mice in a sterile isolation pack.  
914 **(B)** Comparison of commensal gut bacteria compositions between mice  
915 housed in a SPF facility and mice in a sterile isolation pack by metagenomic  
916 sequencing. Differences of bacterial abundance was analyzed by linear  
917 discriminant analysis (LDA) analysis and shown as the histogram of LDA  
918 scores. It was considered a significant effect size with LDA score > 4.0. (p),  
919 Phylum. (c), Class. (o), Order. (f), Family. (g), Genus. (s), Species. **(C)**  
920 Schematic overview of the fecal bacteria transplantation (n=6). The mice bred  
921 in the isolation pack were treated with a mixture of ampicillin (1g/L),  
922 metronidazole (0.5g/L), vancomycin (0.5g/L) and gentamycin (0.5g/L)  
923 dissolved in drinking water supplemented with D-glucose (36.8g/L) for 14 days.  
924 Two weeks after antibiotic treatment, fecal bacteria were freshly prepared from  
925 SPF mice and delivered via oral gavage. **(D)** P144 specific antibody was  
926 determined using an in-house ELISA method. Data are shown as mean±SD  
927 (n=6). Statistical analyses were performed by the method of paired t-test.

928

929 **Figure 5 P144 specific monoclonal antibodies isolated from naïve SPF**  
930 **mice cross-reacted with commensal gut bacteria from both human and**  
931 **mouse**

932 Cross-reactivities between P144 specific mAbs and gut microbial antigens  
933 were detected using WB assays. A purified mouse IgG was used as the control.  
934 **(A)** WB assays of mouse fecal bacteria samples. L: mixed fecal bacteria  
935 samples collected from 3 mice with low levels of pre-existing S2 binding  
936 antibodies ( $OD_{450nm-630nm} \leq 0.140$  at serum dilution of 1:100); H: mixed fecal  
937 bacteria samples collected from 3 mice with high levels of pre-existing S2

938 binding antibodies ( $OD_{450nm-630nm} \geq 0.615$  at serum dilution of 1:100). **(B)** WB  
939 assays of fecal bacteria samples collected from 7 healthy individuals (Lanes  
940 1-7). All the mAbs and the control mouse IgG were diluted at the final  
941 concentration of  $1\mu\text{g/ml}$ . Black arrows indicated the locations of protein bands  
942 chosen for the Mass spectrometry analysis.

943

944 **Figure 6 Impact of pre-existing antibodies on the humoral immune**  
945 **responses elicited by a DNA vaccine encoding SARS-CoV-2 S protein**

946 **(A)** Schematic illustration of the vaccination regimen.  $50\mu\text{g}$  of the candidate  
947 DNA vaccine was injected intramuscularly into each mice at week 0, week 2  
948 and week 4. Two weeks after the final vaccination, the mice was sacrificed for  
949 the measurements of specific immune responses. **(B)** Peripheral blood was  
950 collected before immunization and levels of pre-existing S2 specific IgG were  
951 compared among three groups of mice. **(C)** Comparisons of endpoint IgG titers  
952 against S2 in the serum of mice measured at 2 weeks post the last  
953 immunization. **(D)** Comparisons of P144 specific IgG titers in the serum of  
954 mice as measured using BSA-P144 conjugate as the coating antigen. **(E)**  
955 Comparisons of P144 specific binding antibody levels as determined using a  
956 method of competitive ELISA. **(F)** Endpoint IgG titers against S1 measured at  
957 2 weeks post the final vaccination. **(G)** Neutralizing antibody titers against  
958 SARS-CoV-2 D614G pseudo-virus in serum of mice at 2 weeks post the final  
959 immunization. The vaccination experiment was repeated twice with 6 mice for  
960 each group. Data were shown as  $\text{mean} \pm \text{SD}$ . Statistical analyses were  
961 performed by the method of one-way ANOVA.

962

963 **Figure 7 The impact of pre-existing antibody on the levels of specific IgG**  
964 **and IgA in BALF after vaccination**

965 BALF was collected from each mouse after euthanasia. Specific IgG (A and B)  
966 and IgA (C and D) against S1 or S2 were detected using in-house ELISA  
967 methods. All the BALF samples were adjusted to the initial total protein  
968 concentration of  $51.9\mu\text{g/ml}$ . Data are shown as  $\text{mean} \pm \text{SD}$ . Statistical analyses  
969 were performed by the method of one-way ANOVA.

970

971 **Figure 8 The impact of pre-existing antibody on the minimum epitope**  
972 **recognition of P144 after vaccination.**

973 The minimal epitope recognized by mouse sera after vaccination were  
974 analyzed using a method of competitive ELISA. Purified BSA-P144 conjugate  
975 was used as the coating antigen and truncated peptides derived from P144  
976 were used as the competitors. The decreases of competitive inhibition  
977 reflected the necessity of each amino acid for the epitope recognition.  
978 Statistical analyses were performed by the method of two-tailed t-test (\*,  $P <$   
979  $0.05$ , \*\*,  $P < 0.01$ , \*\*\*,  $P < 0.001$ ).

980

981 **Figure 9 The impact of pre-existing antibody on the cellular immune**  
982 **responses after vaccination**

983 (A) The diagram of the method for cellular immune responses assays. (B) S1  
984 and S2 specific IFN- $\gamma$  responses were compared among groups of mice with  
985 different levels of pre-existing S2 cross-reactive antibodies. Additionally, S1 (C)  
986 and S2 (D) specific releases of IL-2, IL-6 and TNF- $\alpha$  as measured using the  
987 method of multiplex cytokine bead assay were also compared among different  
988 groups. Data were shown as mean  $\pm$  SD. SFU, spot forming units.

989

990 **Figure 10 Levels of pre-existing S2 cross-reactive antibody correlated**  
991 **with RBD binding antibody responses elicited by an inactivated**  
992 **SARS-CoV-2 vaccine**

993 (A) Peripheral blood samples were collected from 28 healthy vaccinees who  
994 received two doses of an inactivated SARS-CoV-2 vaccine at baseline and 14  
995 days post 2<sup>nd</sup> dose, respectively. The RBD binding antibody titers were  
996 measured by ELISA. The neutralizing antibody responses were quantified by a  
997 commercialized surrogate virus neutralization test (sVNT) (Suzhou Sym-Bio  
998 Life Science Co., Ltd). (B and C) Correlations between RBD binding antibody  
999 titers and levels of pre-existing S2 or P144 specific IgG. (D) Correlation  
1000 between neutralizing antibody concentrations and pre-existing P144 binding  
1001 antibody levels. Statistical analyses were performed using the method of  
1002 Spearman's correlation.

1003

1004

1005

1006

1007

1008 **Supplementary figures**

1009

1010 **Supplementary Figure 1 A dominant linear epitope recognized by the**  
1011 **pre-existing antibodies was located on the connector domain of S2**

1012 (A) The location of P144 on the full length of SARS-CoV-2 spike protein.  
1013 Synthesized peptides (18-mer, overlapped by 11 amino acids) spanning the full  
1014 length of S2 were divided into 9 peptide pools, each contained 8 peptides. To  
1015 identify the potential antibody binding epitopes, we first performed competitive  
1016 ELISA assays using the peptide pools as competitors (Data not shown). The  
1017 pool showing significant inhibition effect was further delineated by testing the  
1018 inhibiting efficiencies of each individual peptides (B). The data was shown as  
1019 mean $\pm$ SD, n=5. Inhibition efficiencies among groups were analyzed using the  
1020 method of One-way ANOVA. \*\*\*\*, p<0.0001. SP, signal peptide; RBD,  
1021 receptor-binding domain; FP, fusion peptide; HR, heptad repeat; CH, central  
1022 helix; CD, connector domain; TM, transmembrane domain; CT, cytoplasmic  
1023 tail.

1024

1025 **Supplementary Figure 2 Phylogenetic analysis of the spike protein**  
1026 **sequences of major human coronaviruses**

1027 The sequences of SARS-CoV-2 Wuhan (YP\_009724390), MERS-CoV  
1028 (QFQ59587.1), HCoV-OC43 (QDH43719.1), HCoV-NL63 (AKT07952),  
1029 HCoV-229E (AOG74783.1) and HCoV-HKU1 (YP\_173238) were retrieved  
1030 from NCBI database. The sequences of B.1.1.7, D614G, B.1.351, B.1.525,  
1031 B.1.617 and P.1(B.1.1.281) were obtained from Global Initiative on Sharing  
1032 Avian Influenza Data (GISAID). Boxed fragments represent IEDB predicted  
1033 linear antibody epitope (<http://tools.iedb.org/bcell/>).

1034

1035 **Supplementary Figure 3 Evidences that implied the link between**  
1036 **pre-existing S2 cross-reactive antibodies and commensal gut bacteria**

1037 (A) Principle component analysis (PCA) of gut microbial communities between  
1038 4 mice in SPF condition and 4 mice in a sterile isolation pack. (B) The  
1039 splenocytes and lymphocytes of MLN were harvested from 4 naive C57BL/6J  
1040 mice with relatively high levels of pre-existing S2 cross-reactive antibodies. S2  
1041 specific B cells were defined as CD45<sup>+</sup>CD19<sup>+</sup>S2<sup>+</sup> (Left). Statistical analysis  
1042 was performed by the method of paired t-test (Right).

1043

1044 **Supplementary Figure 4 Characterizations of the minimal epitope**

1045 **recognitions for the 6 monoclonal antibodies isolated from naïve mice**

1046 Six P144 specific monoclonal antibodies were isolated from 2 naïve SPF mice  
1047 using the hybridoma technology. (A) The minimum epitope recognitions of  
1048 clones H9, E10, G13, F5 and G18 were similar detected by a method of  
1049 competitive ELISA. Purified S2 protein was used as the coating antigen and  
1050 the truncated peptides derived from P144 were used as the competitors. (B)  
1051 The epitope recognition of clone M3 was analyzed using purified S2 protein as  
1052 the coating antigen and each listed peptide was used as the competitor. SP,  
1053 signal peptide; RBD, receptor-binding domain; FP, fusion peptide; HR, heptad  
1054 repeat; CH, central helix; CD, connector domain; TM, transmembrane domain;  
1055 CT, cytoplasmic tail.

1056

1057 **Supplementary Figure 5 Neutralizing activities of the purified monoclonal**  
1058 **antibodies as measured using a pseudo virus neutralization assay**

1059 Neutralization activities of 6 isolated mAbs against 5 major SARS-CoV-2  
1060 variants (D614G, B.1.617, B.1.1.7, B.1.351 and P.1) were examined using a  
1061 pseudo virus neutralization assay. Purified mouse IgG was used as negative  
1062 control and serum of an RBD protein vaccinated goat was use as positive  
1063 control. Purified mAbs and control mouse IgG were tested at a concentration  
1064 of 1µg/ml; positive goat serum was diluted at 1:90.

1065

1066 **Supplementary Figure 6 Validation of cross-reactivity between P144**  
1067 **specific mAb and *E. coli***

1068 Proteins in the WCL of *E. coli* (strain DH5α) were separated by SDS-PAGE.  
1069 The cross-reactivity between *E. coli* and P144 specific mAb (clone F5) was  
1070 determined by western blotting. F5 or a purified mouse IgG was used as the  
1071 first antibody at the concentration of 1 µg/ml. Black arrows pointed out the  
1072 bands with MWs equal to *E. coli* proteins identified by LCMS analysis.

1073

# Figures and Figure legends

Figure 1

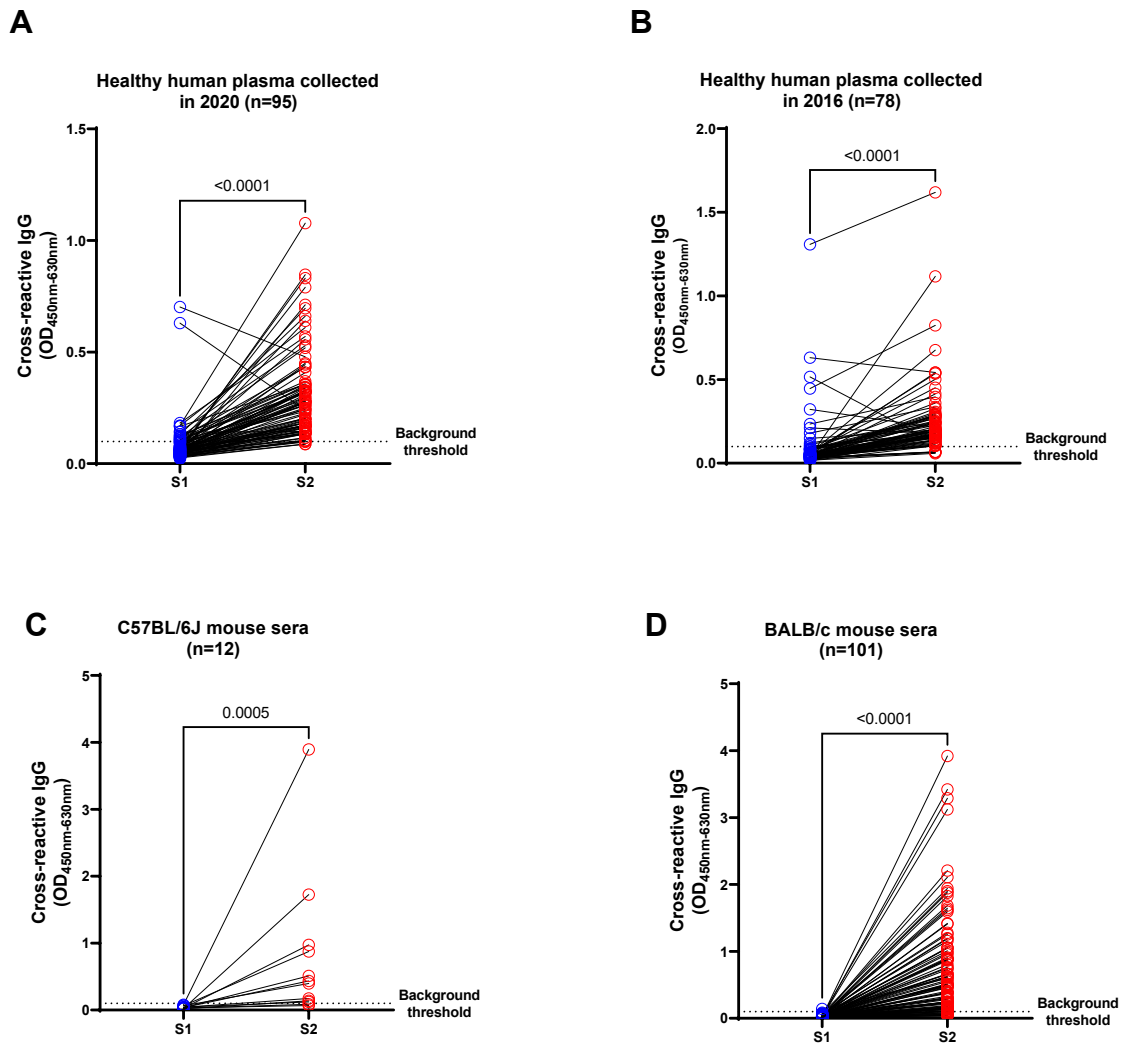

**Figure 1. Pre-existing cross-reactive antibodies against SARS-CoV-2 S protein observed in both healthy human and naïve SPF mice predominantly targeted S2 subunit.** The pre-existing cross-reactive antibodies against S1 and S2 were measured using an in-house ELISA (Sample dilution factor: 100). **(A)** Plasma samples of healthy individuals collected in 2020 (n=95). **(B)** Plasma samples of healthy individuals collected in 2016 (n=78). **(C)** Sera of naïve C57BL/6J mice (n=12). **(D)** Sera of naïve BALB/c mice (n=101). The dot lines showed the threshold of background (3 folds of the background OD). Statistical analyses were performed using the method of paired t-test.

**Figure 2**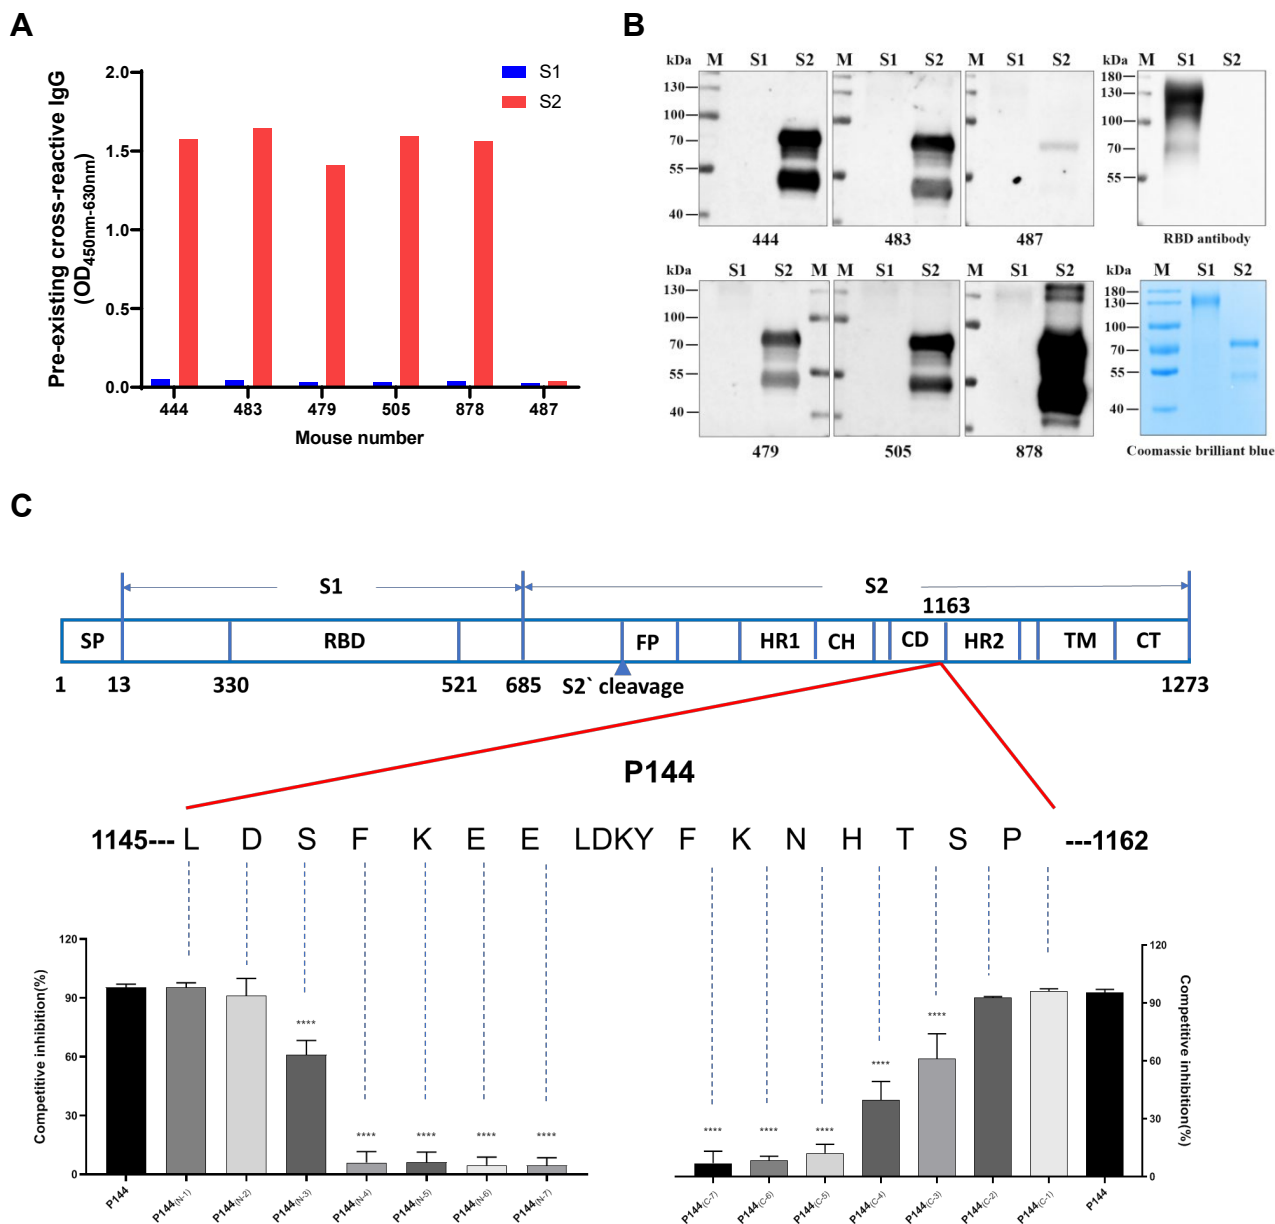



Figure 3

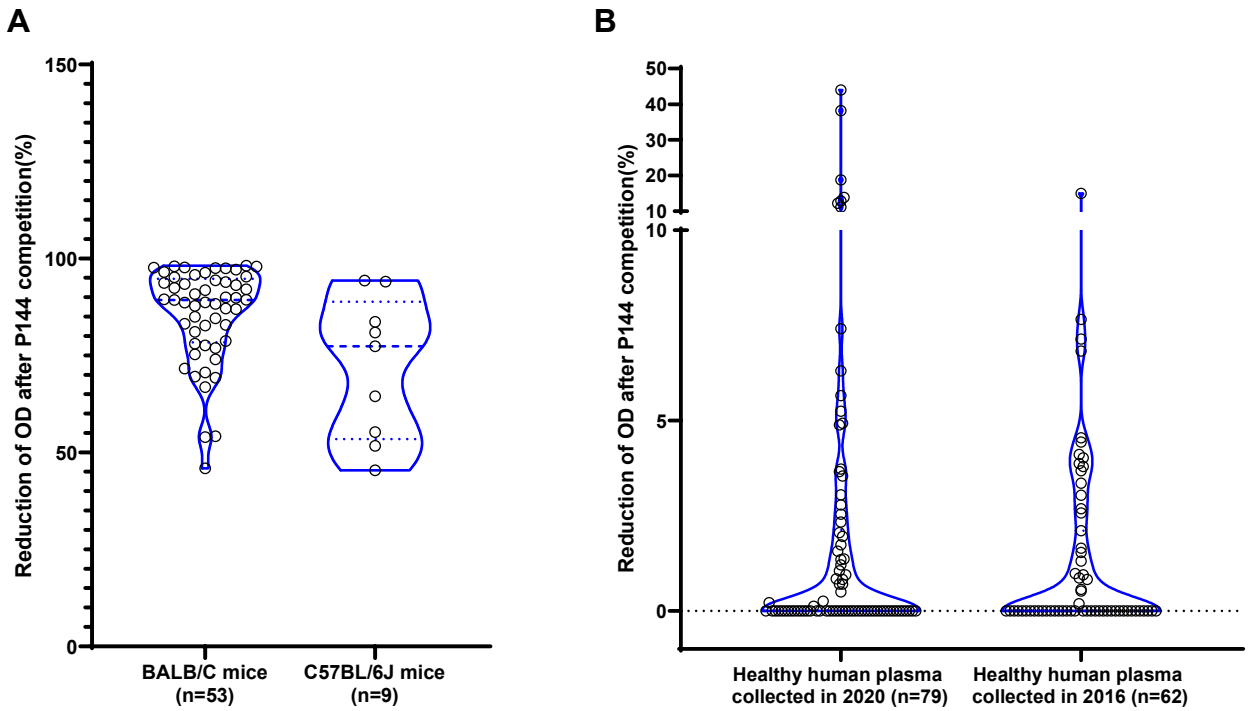

**Figure 3. Cross-reactive antibodies recognizing epitope P144 widely existed in both healthy human and naïve SPF mice.** P144 specific binding antibodies were detected using a method of competitive ELISA. **(A)** For the detections of P144 specific binding antibodies in naïve SPF mice, purified S2 protein was used as the coating antigen and P144 peptide was used as the competitor. **(B)** For the detections of P144 specific binding antibodies in healthy individuals, purified BSA-P144 conjugate was used as the coating antigen and P144 peptide was used as the competitor. In both experiments, the reduction of OD value reflected the presence of P144 binding antibodies.

**Figure 4**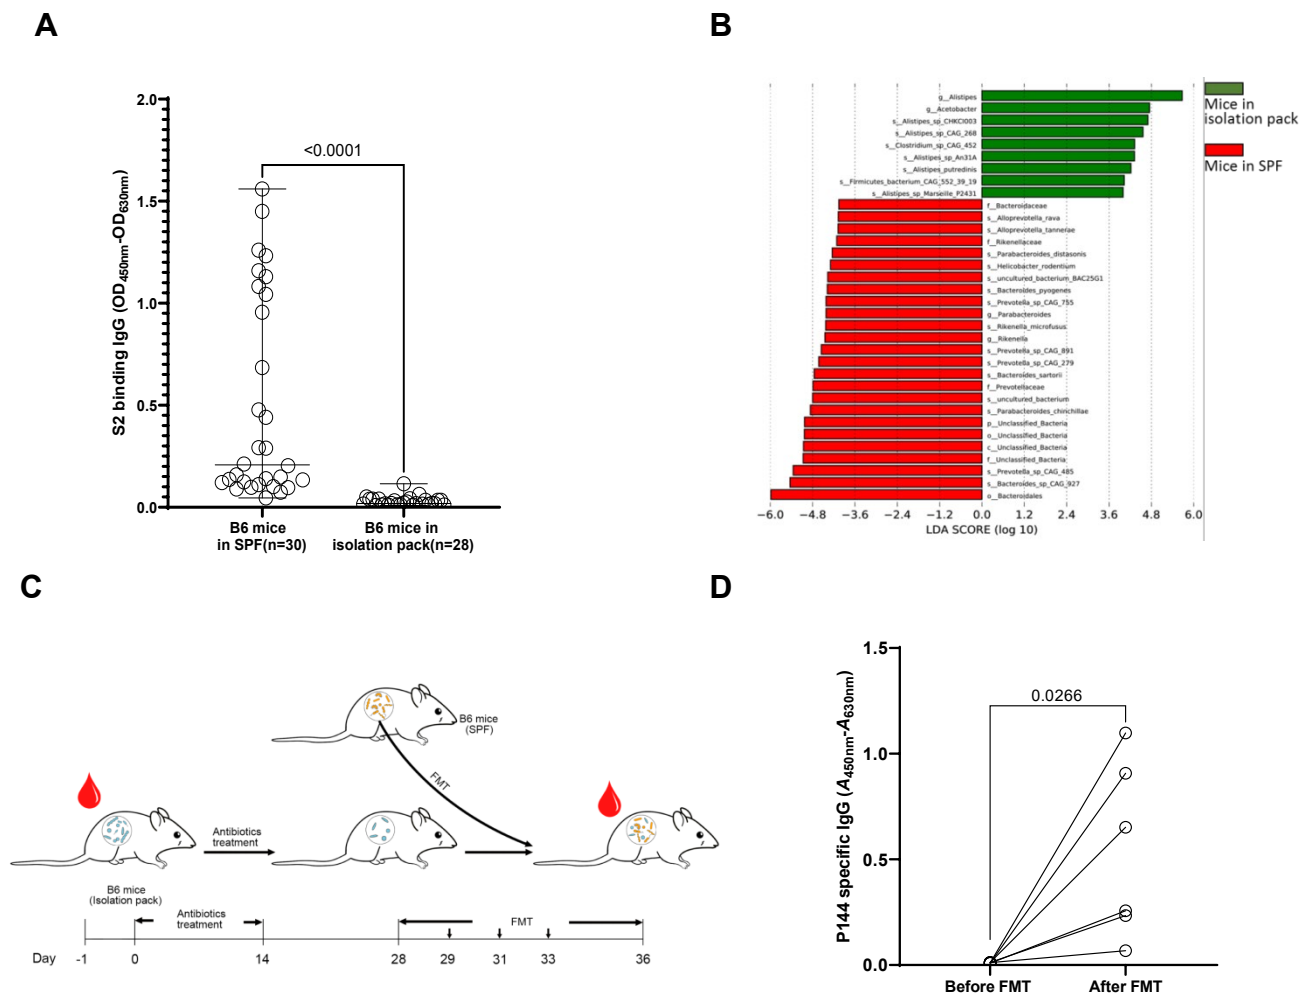

**Figure 4. The generation of the pre-existing S2 cross-reactive antibodies might be associated with commensal gut microbiota. (A)** Comparison of the levels of S2 specific pre-existing antibodies between naïve mice maintained under SPF condition and mice in a sterile isolation pack. **(B)** Comparison of commensal gut bacteria compositions between mice housed in a SPF facility and mice in a sterile isolation pack by metagenomic sequencing. Differences of bacterial abundance was analyzed by linear discriminant analysis (LDA) analysis and shown as the histogram of LDA scores. It was considered a significant effect size with LDA score > 4.0. (p), Phylum. (c), Class. (o), Order. (f), Family. (g), Genus. (s), Species. **(C and D)** P144 specific antibodies were induced in mice bred in the isolation pack after being transplanted with fecal bacteria isolated from SPF mice. **(C)** Schematic overview of the fecal bacteria transplantation (n=6). The mice bred in the isolation pack were treated with a mixture of ampicillin (1g/L), metronidazole (0.5g/L), vancomycin (0.5g/L) and gentamycin (0.5g/L) in drinking water supplemented with D-glucose (36.8g/L) for 14 days. Two weeks after antibiotic treatment, fecal bacteria were freshly prepared from SPF mice and delivered via oral gavage. **(D)** For the detections of P144 cross-reactive antibodies, purified BSA-P144 conjugate was used as the coating antigen and specific binding antibody was determined using an in-house ELISA method. Data are shown as mean±SD. Statistical analyses were performed by the method of paired t-test.

**Figure 5**

**A**

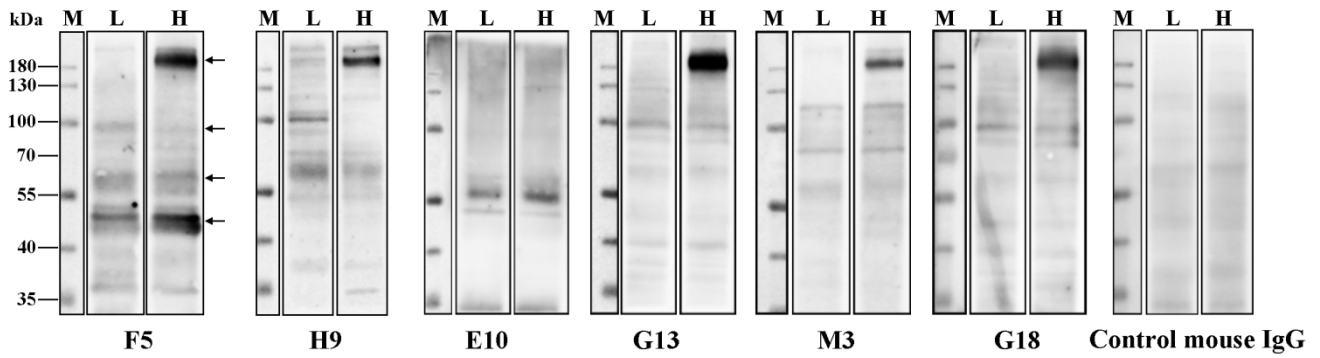

**B**

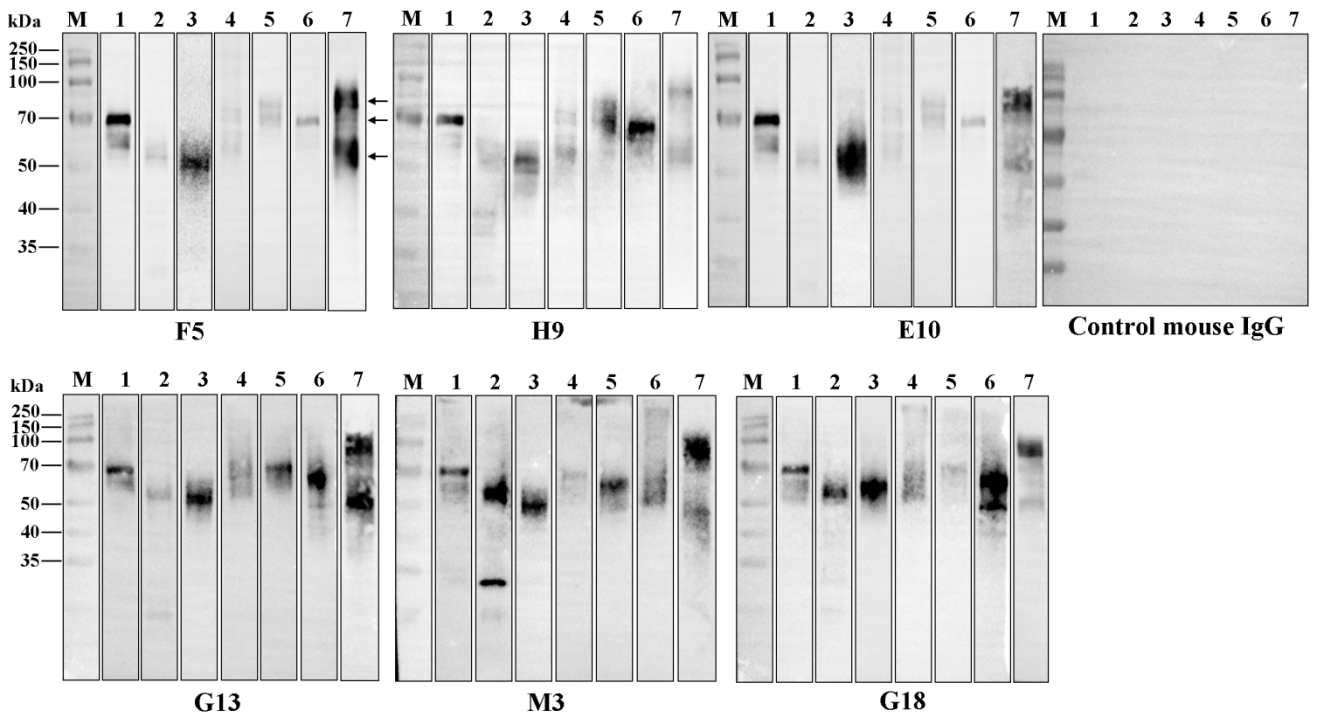

**Figure 5. P144 specific monoclonal antibodies isolated from naïve SPF mice cross-reacted with commensal gut bacteria from both human and mouse.** Cross-reactivities between P144 specific mAbs and gut microbial antigens were detected using WB assays. A purified mouse IgG was used as the control. **(A)** WB assays of mouse fecal bacteria samples. L: mixed fecal bacteria samples collected from 3 mice with low levels of pre-existing S2 binding antibodies ( $OD_{450nm-630nm} \leq 0.140$  at serum dilution of 1:100); H: mixed fecal bacteria samples collected from 3 mice with high levels of pre-existing S2 binding antibodies ( $OD_{450nm-630nm} \geq 0.615$  at serum dilution of 1:100). **(B)** WB assays of fecal bacteria samples collected from 7 healthy individuals (Lanes 1-7). All the mAbs and the control mouse IgG were diluted at the final concentration of  $1\mu g/ml$ . Black arrows indicated the locations of protein bands chosen for the Mass spectrometry analysis.

**Figure 6**

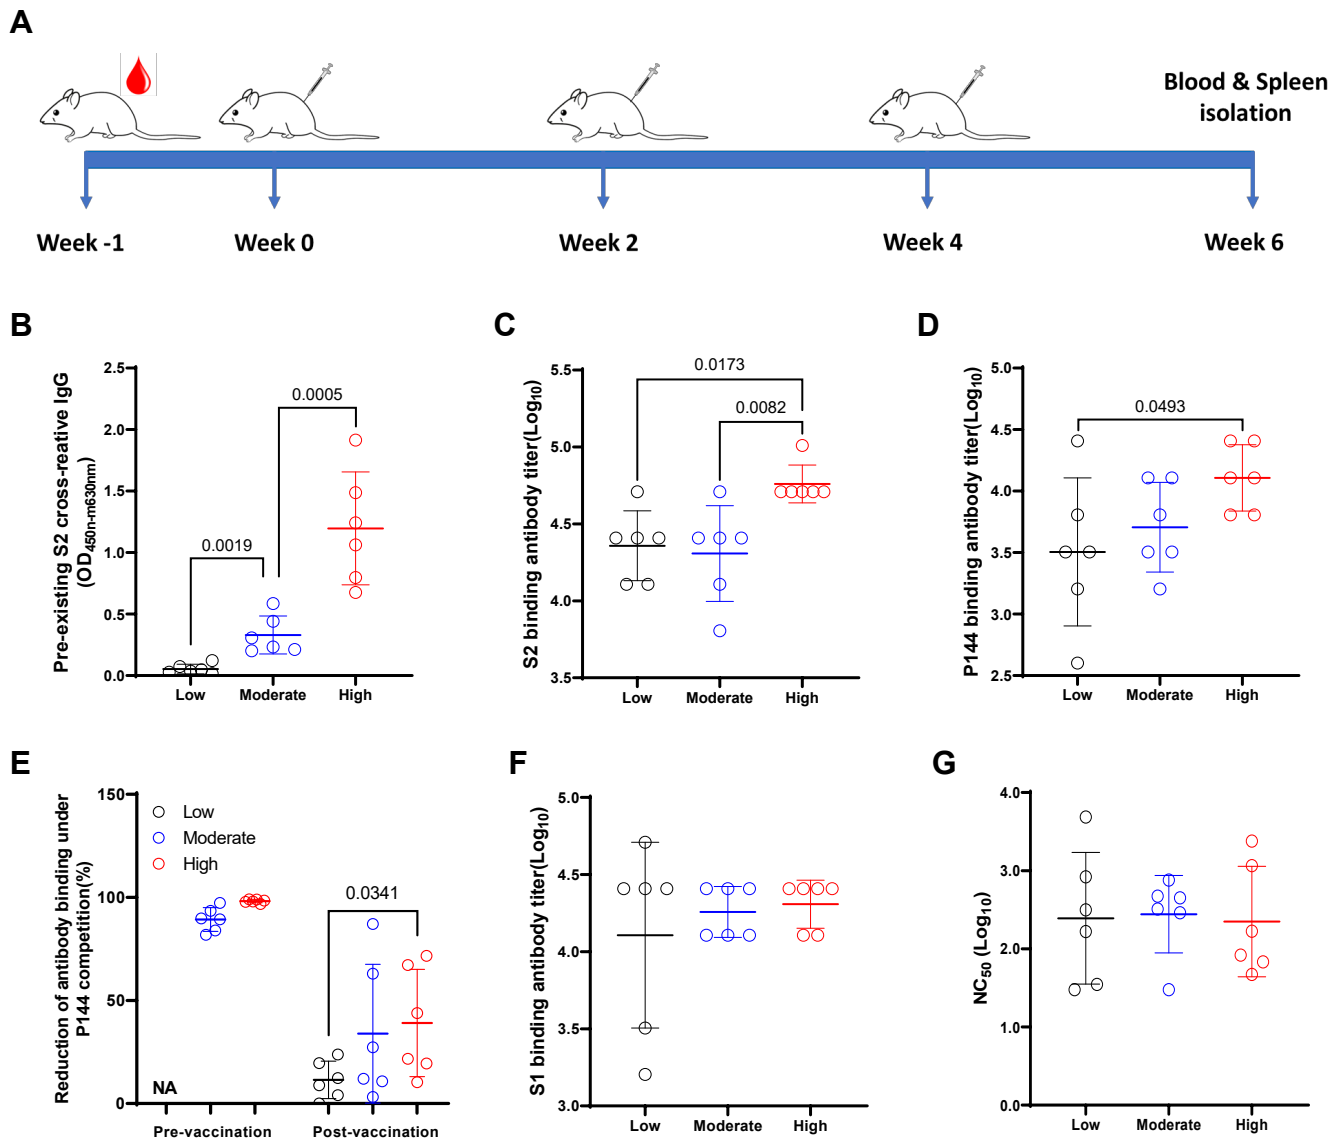

**Figure 6. Impact of pre-existing antibodies on the humoral immune responses elicited by a DNA vaccine encoding SARS-CoV-2 S protein. (A)** Schematic illustration of the vaccination regimen. 50µg of the candidate DNA vaccine was injected intra muscularly into each mice at week 0, week 2 and week 4. Two weeks after the final vaccination, the mice was sacrificed for the measurements of specific immune responses. **(B)** Peripheral blood was collected before immunization and levels of pre-existing S2 specific IgG were compared among three groups of mice. **(C)** Comparisons of endpoint IgG titers against S2 in the serum of mice measured at 2 weeks post the last immunization. **(D)** Comparisons of P144 specific IgG titers in the serum of mice as measured using BSA-P144 conjugate as the coating antigen. **(E)** Comparisons of P144 specific binding antibody levels as determined using a method of competitive ELISA. **(F)** Endpoint IgG titers against S1 measured at 2 weeks post the final vaccination. **(G)** Neutralizing antibody titers against SARS-CoV-2 D614G pseudo-virus in serum of mice at 2 weeks post the final immunization. The vaccination experiment was repeated twice with 6 mice for each group. Data were shown as mean±SD. Statistical analyses were performed by the method of one-way ANOVA.

**Figure 7**

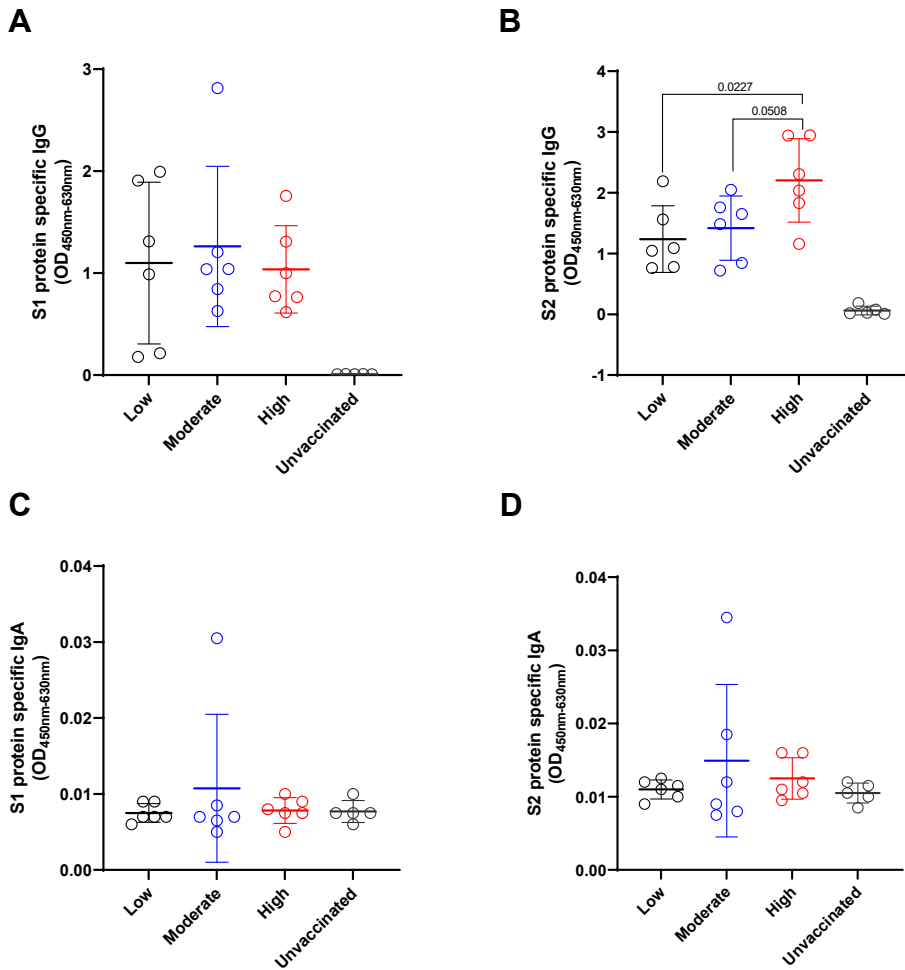

**Figure 7. The impact of pre-existing antibody on the levels of specific IgG and IgA in BALF after vaccination.** BALF was collected from each mouse after euthanasia. Specific IgG (A and B) and IgA (C and D) against S1 or S2 were detected using in-house ELISA methods. All the BALF samples were adjusted to the initial total protein concentration of 51.9 $\mu$ g/ml. Data are shown as mean $\pm$  SD. Statistical analyses were performed by the method of one-way ANOVA.

Figure 8

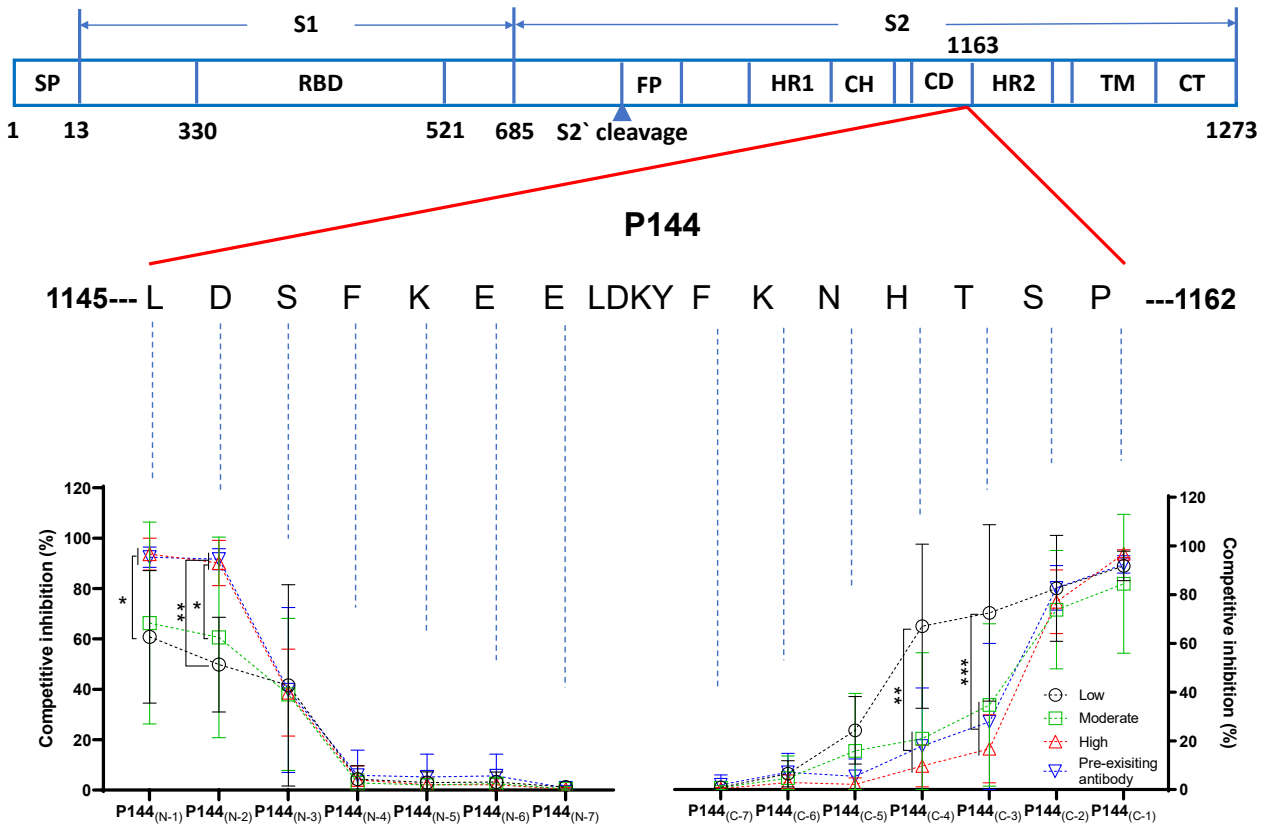

**Figure 8. The impact of pre-existing antibody on the minimum epitope recognition of P144 after vaccination.** The minimal epitope recognized by mouse sera after vaccination were analyzed using a method of competitive ELISA. Purified BSA-P144 conjugate was used as the coating antigen and truncated peptides derived from P144 were used as the competitors. The decreases of competitive inhibition reflected the necessity of each amino acid for the epitope recognition. Statistical analyses were performed by the method of two-tailed t-test (\*,  $P < 0.05$ , \*\*,  $P < 0.01$ , \*\*\*,  $P < 0.001$ ).

**Figure 9**

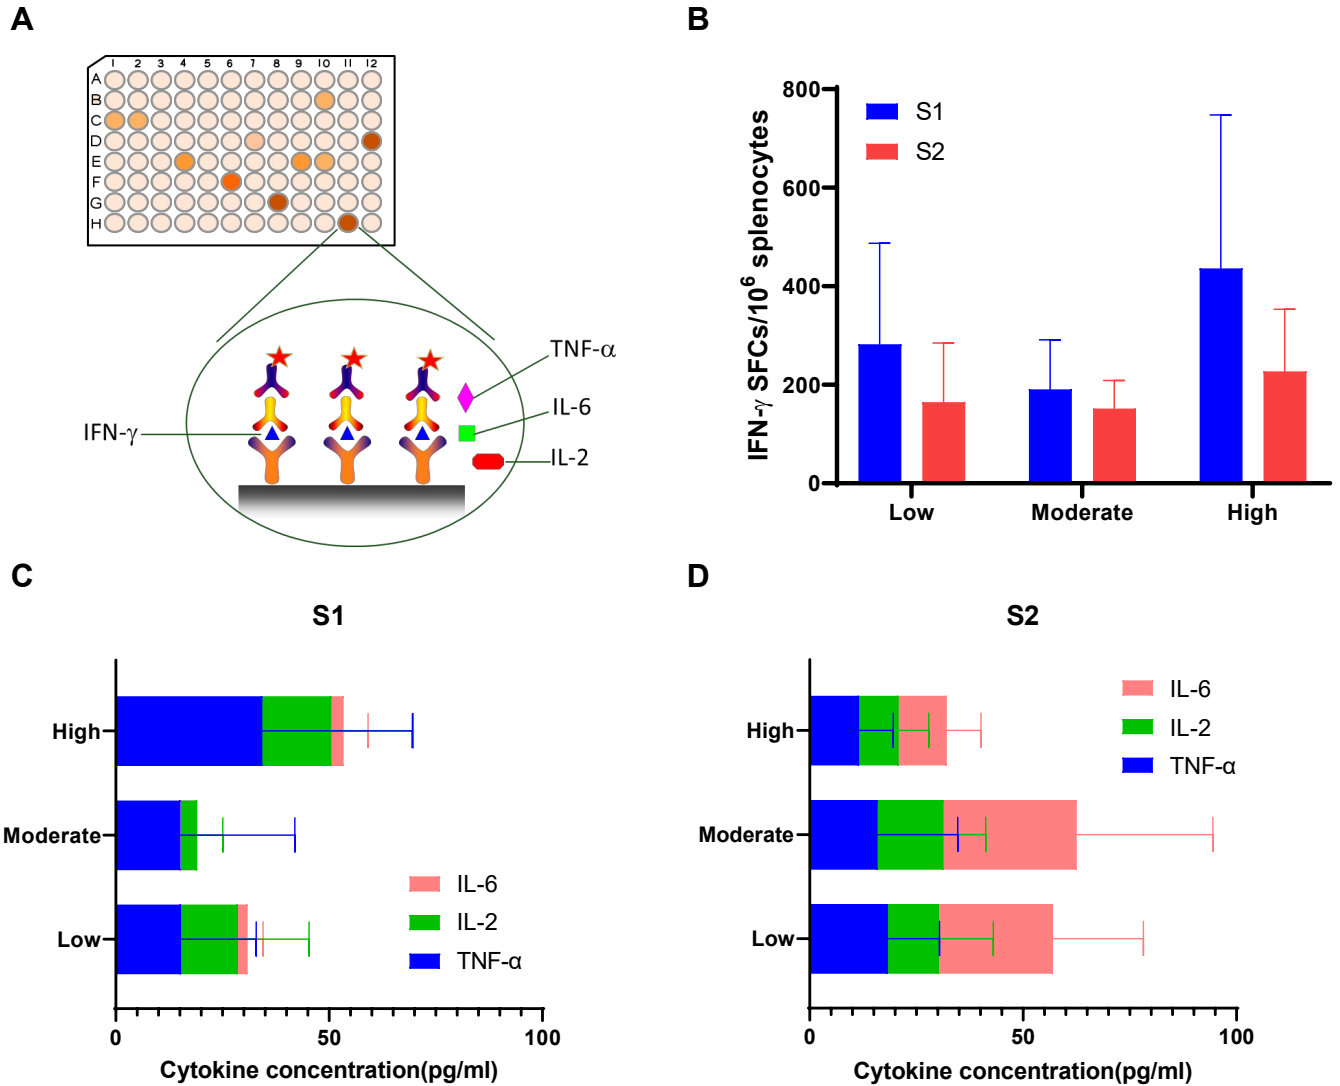

**Figure 9. The impact of pre-existing antibody on the cellular immune responses after vaccination.** (A) The diagram of the method for cellular immune responses assays. (B) S1 and S2 specific IFN- $\gamma$  responses were compared among groups of mice with different levels of pre-existing S2 cross-reactive antibodies. Additionally, S1 (C) and S2 (D) specific releases of IL-2, IL-6 and TNF- $\alpha$  as measured using the method of multiplex cytokine bead assay were also compared among different groups. Data were shown as mean  $\pm$  SD. SFU, spot forming units.

**Figure 10**

**A**

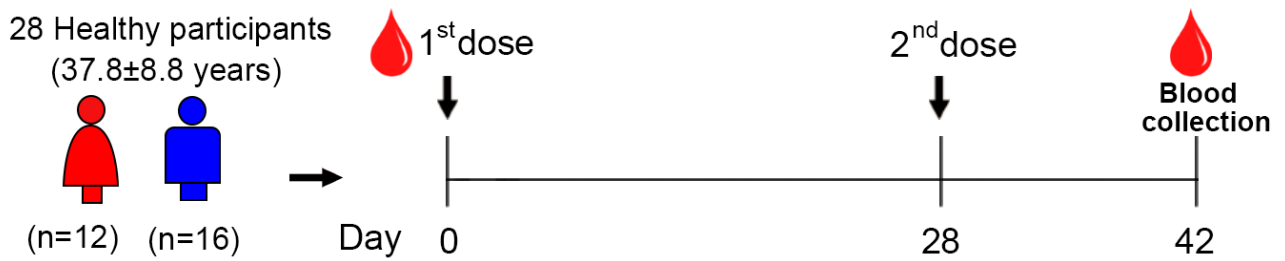

**B**

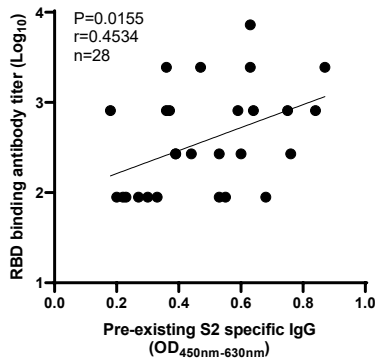

**C**

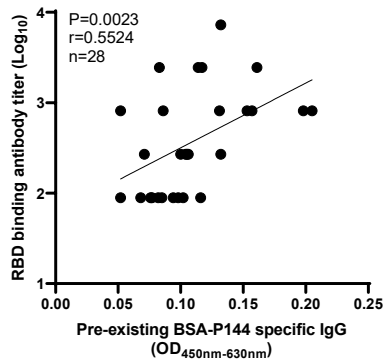

**D**

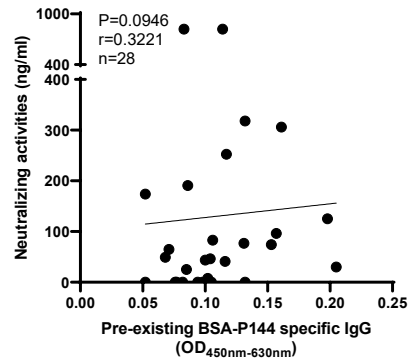

**Figure 10. Correlation of pre-existing antibody with RBD and neutralizing activities in healthy individuals vaccinated with inactivated COVID19 vaccine (BBIBP-CorV).** (A) 28 healthy individuals were selected and their plasma were collected both before and after vaccinated with inactivated COVID19 vaccine twice. The pre-existing P144 and pre-existing S2 specific antibody were evaluated in plasma before vaccination. The neutralization activities and RBD binding antibody titer were analyzed in plasma after vaccination. (B and C) Correlation between RBD binding antibody titer with pre-existing S2 specific IgG or pre-existing BSA-P144 specific IgG. (D) Correlation between neutralizing activities with pre-existing BSA-P144 specific IgG. All Correlation was statistically evaluated using Spearman's correlation and linear regression.



**Table 1** Demographics of SARS-CoV-2 unexposed healthy individuals

| <b>Sample Collection Time</b> | <b>2016</b>      | <b>2020</b>      |
|-------------------------------|------------------|------------------|
| Number of individuals         | 78               | 95               |
| Gender (males, females)       | 17, 61           | 78, 17           |
| Age, years (mean $\pm$ SD)    | 35.88 $\pm$ 8.40 | 30.40 $\pm$ 7.55 |

**Table 2** Potential cross-reactive antigens identified in mouse fecal bacteria

| NCBI Accession # | Protein name                                                | Bacterium                                       | Score  | Proteins | Unique Peptides | Peptides | PSMs | Area    | MW [kDa] |
|------------------|-------------------------------------------------------------|-------------------------------------------------|--------|----------|-----------------|----------|------|---------|----------|
| Q8A470           | DNA-directed RNA polymerase subunit beta' OS                | Bacteroides thetaiotaomicron                    | 168.01 | 550      | 2               | 6        | 6    | 3.536E7 | 158.3    |
| Q5L897           | DNA-directed RNA polymerase subunit beta OS                 | Bacteroides fragilis                            | 92.15  | 8        | 2               | 3        | 3    | 8.315E6 | 142.4    |
| Q8A1G1           | TonB-dependent receptor SusC OS                             | Bacteroides thetaiotaomicron                    | 145.74 | 1        | 1               | 2        | 3    | 1.385E8 | 111.1    |
| Q46509           | Aldehyde oxidoreductase OS                                  | Desulfovibrio gigas                             | 75.93  | 1        | 1               | 1        | 1    | 8.506E6 | 97.0     |
| P22983           | Pyruvate, phosphate dikinase OS                             | Clostridium symbiosum                           | 109.83 | 7        | 2               | 2        | 2    | 3.721E7 | 96.6     |
| P0A9Q8           | Aldehyde-alcohol dehydrogenase OS                           | Escherichia coli                                | 34.29  | 1        | 1               | 1        | 1    | 1.085E7 | 96.1     |
| Q826F6           | Chaperone protein dnaK2 OS                                  | Streptomyces avermitilis                        | 20.37  | 1        | 1               | 1        | 1    | 1.059E7 | 67.5     |
| Q892R0           | Chaperone protein DnaK OS                                   | Clostridium tetani                              | 51.52  | 5        | 1               | 1        | 1    | 1.780E7 | 66.4     |
| B1I9W8           | L-fucose isomerase OS                                       | Streptococcus pneumoniae                        | 57.33  | 12       | 2               | 2        | 2    | 2.792E7 | 65.7     |
| P95334           | Chaperone protein DnaK OS                                   | Myxococcus xanthus                              | 39.23  | 4        | 1               | 1        | 1    | 1.792E7 | 65.3     |
| Q1MPZ9           | Formate--tetrahydrofolate ligase OS                         | Lawsonia intracellularis                        | 62.49  | 1        | 2               | 2        | 2    | 2.068E7 | 64.2     |
| P26929           | Urease subunit alpha OS                                     | Lactobacillus fermentum                         | 134.06 | 4        | 4               | 4        | 5    | 1.526E7 | 61.8     |
| Q9I165           | Periplasmic trehalase OS                                    | Pseudomonas aeruginosa                          | 77.05  | 1        | 1               | 1        | 1    | 4.240E8 | 61.1     |
| Q9EZ02           | Pyrophosphate--fructose 6-phosphate 1-phosphotransferase OS | Spirochaeta thermophila                         | 68.21  | 2        | 1               | 1        | 1    | 1.192E7 | 61.0     |
| P14407           | Fumarate hydratase class I, anaerobic OS                    | Escherichia coli                                | 30.79  | 1        | 1               | 1        | 1    | 6.580E6 | 60.1     |
| Q189R2           | Formate--tetrahydrofolate ligase OS                         | Clostridioides difficile                        | 123.52 | 22       | 3               | 4        | 4    | 2.621E7 | 59.9     |
| P22252           | Flagellin B OS                                              | Campylobacter jejuni subsp. jejuni serotype O:6 | 75.42  | 1        | 1               | 1        | 1    | 1.478E7 | 59.7     |
| Q1WTW0           | Formate--tetrahydrofolate ligase OS                         | Lactobacillus salivarius                        | 83.43  | 23       | 1               | 1        | 1    | 5.229E7 | 59.4     |
| A7HLZ4           | Formate--tetrahydrofolate ligase OS                         | Fervidobacterium nodosum                        | 93.49  | 29       | 1               | 2        | 2    | 8.036E6 | 59.2     |
| C4ZBL1           | Phosphoenolpyruvate carboxykinase (ATP) OS                  | Agathobacter rectalis                           | 211.34 | 4        | 1               | 4        | 5    | 3.965E7 | 59.0     |
| A6LFQ4           | Phosphoenolpyruvate carboxykinase (ATP) OS                  | Parabacteroides distasonis                      | 32.29  | 1        | 1               | 1        | 1    | 8.523E6 | 58.9     |
| A3MZI4           | Formate--tetrahydrofolate ligase OS                         | Actinobacillus pleuropneumoniae serotype 5b     | 78.45  | 78       | 1               | 2        | 2    | 1.320E8 | 58.9     |
| Q2LPJ8           | 60 kDa chaperonin 1 OS                                      | Syntrophus aciditrophicus                       | 101.22 | 15       | 1               | 2        | 3    | 2.217E7 | 58.6     |
| Q3ALZ3           | 60 kDa chaperonin 1 OS                                      | Synechococcus sp.                               | 113.34 | 23       | 1               | 2        | 3    | 9.973E7 | 58.5     |
| B8J123           | 60 kDa chaperonin OS                                        | Desulfovibrio desulfuricans                     | 232.59 | 27       | 2               | 5        | 6    | 9.659E7 | 58.4     |
| Q72AL6           | 60 kDa chaperonin OS                                        | Desulfovibrio vulgaris                          | 126.02 | 9        | 1               | 3        | 3    | 2.402E7 | 58.4     |

|        |                                                     |                                                      |        |     |   |   |   |         |      |
|--------|-----------------------------------------------------|------------------------------------------------------|--------|-----|---|---|---|---------|------|
| A0Q2T1 | 60 kDa chaperonin OS                                | <i>Clostridium novyi</i>                             | 78.78  | 16  | 1 | 2 | 2 | 2.292E7 | 58.1 |
| B0SCC0 | 60 kDa chaperonin OS                                | <i>Leptospira biflexa</i> serovar Patoc              | 49.58  | 1   | 1 | 1 | 1 | 1.882E8 | 58.1 |
| B2TIX0 | 60 kDa chaperonin OS                                | <i>Clostridium botulinum</i>                         | 126.34 | 35  | 1 | 3 | 3 | 4.903E7 | 57.9 |
| A7GZ43 | 60 kDa chaperonin OS                                | <i>Campylobacter curvus</i>                          | 105.05 | 41  | 2 | 3 | 3 | 5.327E7 | 57.9 |
| Q67KB8 | 60 kDa chaperonin OS                                | <i>Symbiobacterium thermophilum</i>                  | 107.47 | 126 | 1 | 3 | 3 | 9.411E7 | 57.9 |
| B5YDR9 | 60 kDa chaperonin OS                                | <i>Dictyoglomus thermophilum</i>                     | 59.61  | 2   | 1 | 1 | 1 | 3.345E7 | 57.9 |
| Q3ADX3 | 60 kDa chaperonin OS                                | <i>Carboxydotherrnus hydrogenoformans</i>            | 104.07 | 25  | 1 | 2 | 3 | 7.715E7 | 57.6 |
| O50305 | 60 kDa chaperonin OS                                | <i>Bacillus halodurans</i>                           | 250.57 | 55  | 3 | 4 | 6 | 3.021E8 | 57.4 |
| P26821 | 60 kDa chaperonin OS                                | <i>Clostridium perfringens</i>                       | 131.27 | 36  | 1 | 3 | 3 | 4.609E7 | 57.3 |
| P37282 | 60 kDa chaperonin OS                                | <i>Lactococcus lactis</i> subsp. <i>lactis</i>       | 102.15 | 18  | 1 | 2 | 2 | 4.298E7 | 57.2 |
| C4ZD46 | 60 kDa chaperonin OS                                | <i>Agathobacter rectalis</i>                         | 372.10 | 52  | 3 | 5 | 8 | 3.352E8 | 57.1 |
| A6L8C4 | Glucose-6-phosphate isomerase OS                    | <i>Parabacteroides distasonis</i>                    | 88.85  | 55  | 1 | 2 | 3 | 5.392E8 | 48.7 |
| P43793 | NADP-specific glutamate dehydrogenase OS            | <i>Haemophilus influenzae</i>                        | 96.32  | 2   | 1 | 2 | 2 | 7.357E7 | 48.6 |
| P00370 | NADP-specific glutamate dehydrogenase OS            | <i>Escherichia coli</i>                              | 161.88 | 1   | 1 | 3 | 4 | 3.280E8 | 48.6 |
| P15111 | NADP-specific glutamate dehydrogenase OS            | <i>Salmonella typhimurium</i>                        | 185.28 | 4   | 1 | 4 | 5 | 1.755E8 | 48.5 |
| P94316 | NAD-specific glutamate dehydrogenase OS             | <i>Bacteroides fragilis</i>                          | 192.93 | 3   | 3 | 5 | 6 | 1.730E8 | 48.4 |
| Q1WSY0 | Enolase OS                                          | <i>Lactobacillus salivarius</i>                      | 79.89  | 8   | 3 | 3 | 3 | 1.340E7 | 48.0 |
| B7MD95 | Trigger factor OS                                   | <i>Escherichia coli</i> O45:K1                       | 78.80  | 10  | 2 | 2 | 2 | 4.344E7 | 47.8 |
| B2GAM0 | Enolase OS                                          | <i>Lactobacillus fermentum</i>                       | 79.94  | 8   | 2 | 2 | 2 | 1.858E7 | 47.8 |
| Q6MEY2 | Enolase OS                                          | <i>Protochlamydia amoebophila</i>                    | 112.67 | 1   | 1 | 1 | 1 | 7.493E7 | 47.5 |
| Q0SNH5 | Enolase OS                                          | <i>Borrelia afzelii</i>                              | 71.86  | 2   | 1 | 1 | 1 | 4.654E7 | 47.4 |
| G3KIM4 | Lactoyl-CoA dehydratase subunit alpha (Fragment) OS | <i>Anaerotignum propionicum</i>                      | 63.03  | 1   | 1 | 1 | 1 | 1.136E7 | 47.4 |
| Q9I3S1 | Biofilm dispersion protein BdlA OS                  | <i>Pseudomonas aeruginosa</i>                        | 59.07  | 22  | 1 | 1 | 1 | 3.282E7 | 46.9 |
| B8J4A8 | Sulfate adenyllyltransferase OS                     | <i>Desulfovibrio desulfuricans</i>                   | 210.65 | 1   | 5 | 5 | 5 | 2.656E7 | 46.9 |
| A6L3M9 | Enolase OS                                          | <i>Bacteroides vulgatus</i>                          | 48.62  | 2   | 1 | 2 | 2 | 3.004E7 | 46.7 |
| Q043Z5 | Enolase 1 OS                                        | <i>Lactobacillus gasseri</i>                         | 289.72 | 4   | 5 | 5 | 5 | 4.189E7 | 46.6 |
| Q1ISS7 | Enolase OS                                          | <i>Koribacter versatilis</i>                         | 71.57  | 4   | 1 | 1 | 1 | 7.884E6 | 46.5 |
| B8DTI9 | Enolase OS                                          | <i>Bifidobacterium animalis</i> subsp. <i>lactis</i> | 115.71 | 4   | 2 | 2 | 2 | 1.684E7 | 46.4 |
| A7GUR7 | Enolase OS                                          | <i>Bacillus cytotoxicus</i>                          | 122.68 | 17  | 2 | 2 | 3 | 2.771E7 | 46.4 |
| Q2LR33 | Enolase OS                                          | <i>Syntrophus aciditrophicus</i>                     | 31.73  | 1   | 1 | 1 | 1 | 4.823E7 | 46.2 |
| Q89Z05 | Enolase OS                                          | <i>Bacteroides thetaiotaomicron</i>                  | 140.16 | 2   | 2 | 4 | 5 | 3.005E7 | 46.1 |

|        |                                    |                                          |        |     |   |    |    |         |      |
|--------|------------------------------------|------------------------------------------|--------|-----|---|----|----|---------|------|
| B2RLL7 | Enolase OS                         | Porphyromonas gingivalis                 | 123.91 | 2   | 2 | 3  | 3  | 2.636E7 | 45.8 |
| Q6MPQ2 | Enolase OS                         | Bdellovibrio bacteriovorus               | 66.50  | 1   | 1 | 1  | 1  | 8.918E6 | 45.7 |
| B0K742 | Serine hydroxymethyltransferase OS | Thermoanaerobacter pseudethanolicus      | 85.67  | 92  | 2 | 2  | 2  | 2.140E7 | 45.6 |
| Q5LFT7 | Peptidase T OS                     | Bacteroides fragilis                     | 89.56  | 5   | 1 | 1  | 1  | 7.323E7 | 45.5 |
| A9NEA9 | Serine hydroxymethyltransferase OS | Acholeplasma laidlawii                   | 44.82  | 3   | 1 | 1  | 1  | 5.875E6 | 45.3 |
| Q7MU77 | Phosphoglycerate kinase OS         | Porphyromonas gingivalis                 | 54.70  | 1   | 1 | 1  | 1  | 2.106E7 | 45.0 |
| Q8A753 | Phosphoglycerate kinase OS         | Bacteroides thetaiotaomicron             | 25.30  | 1   | 1 | 1  | 1  | 1.320E7 | 45.0 |
| A5VHR0 | Phosphopentomutase OS              | Lactobacillus reuteri                    | 159.08 | 1   | 4 | 4  | 4  | 4.364E7 | 44.0 |
| A8EWM4 | Phosphoglycerate kinase OS         | Arcobacter butzleri                      | 45.52  | 1   | 1 | 1  | 1  | 2.577E7 | 43.8 |
| Q042T5 | Elongation factor Tu OS            | Lactobacillus gasseri                    | 400.92 | 36  | 3 | 10 | 13 | 1.184E8 | 43.7 |
| Q74JU6 | Elongation factor Tu OS            | Lactobacillus johnsonii                  | 348.06 | 36  | 2 | 9  | 12 | 1.184E8 | 43.6 |
| Q5L890 | Elongation factor Tu OS            | Bacteroides fragilis                     | 185.88 | 297 | 3 | 5  | 7  | 1.454E8 | 43.6 |
| Q8R603 | Elongation factor Tu OS            | Fusobacterium nucleatum subsp. nucleatum | 150.02 | 302 | 1 | 3  | 3  | 6.170E7 | 43.4 |
| B8J1A0 | Elongation factor Tu OS            | Desulfovibrio desulfuricans              | 139.50 | 64  | 2 | 3  | 3  | 4.287E7 | 43.4 |
| A5VJ92 | Elongation factor Tu OS            | Lactobacillus reuteri                    | 413.79 | 60  | 8 | 11 | 13 | 3.595E8 | 43.4 |

**Note:** *Score:* The Mascot score. *Proteins:* The total number of proteins contained in the protein group. *Unique Peptides:* The total number of peptides unique to the protein group. *Peptides:* The total number of peptides identified from all included searches for the master protein of the protein group. *PSMs:* The total number of peptide-spectrum matches identified from all included searches for the master protein of the protein group. *Area:* The chromatographic peak area was used to characterize the quantitative abundance of protein. *MW(kDa):* The theoretical molecular weight of the protein.

**Table 3** Potential cross-reactive antigens identified in human fecal bacteria

| NCBI Accession # | Protein Name                                                       | Bacterium                         | Score  | Proteins | Unique Peptides | Peptides | PSMs | Area    | MW [kDa] |
|------------------|--------------------------------------------------------------------|-----------------------------------|--------|----------|-----------------|----------|------|---------|----------|
| A6LFK9           | Polyribonucleotide nucleotidyltransferase OS                       | Parabacteroides distasonis        | 62.68  | 3        | 1               | 2        | 2    | 2.332E7 | 82.0     |
| P75764           | Uncharacterized protein YbhJ OS                                    | Escherichia coli                  | 27.35  | 1        | 1               | 1        | 1    | 3.198E7 | 81.5     |
| Q8A4N6           | Polyribonucleotide nucleotidyltransferase OS                       | Bacteroides thetaiotaomicron      | 226.97 | 23       | 6               | 7        | 7    | 6.947E7 | 78.3     |
| B3DT30           | Elongation factor G OS                                             | Bifidobacterium longum            | 236.98 | 64       | 8               | 10       | 11   | 4.407E7 | 78.1     |
| E1WNR6           | Chaperone protein htpG OS                                          | Bacteroides fragilis              | 131.15 | 4        | 1               | 2        | 2    | 4.992E7 | 77.9     |
| O31673           | ATP-dependent Clp protease ATP-binding subunit ClpE OS             | Bacillus subtilis                 | 120.19 | 73       | 1               | 3        | 4    | 8.448E7 | 77.9     |
| A7ZSL5           | Elongation factor G OS                                             | Escherichia coli O139:H28         | 133.81 | 92       | 2               | 3        | 4    | 2.888E7 | 77.5     |
| Q5L8A7           | Elongation factor G OS                                             | Bacteroides fragilis              | 431.35 | 187      | 3               | 10       | 14   | 1.391E8 | 77.5     |
| A6KYJ7           | Elongation factor G OS                                             | Bacteroides vulgatus              | 361.61 | 186      | 2               | 9        | 12   | 1.342E8 | 77.4     |
| A6LFP0           | Methionine--tRNA ligase OS                                         | Parabacteroides distasonis        | 65.86  | 8        | 1               | 1        | 1    | 4.772E7 | 77.4     |
| P39396           | Pyruvate/proton symporter BtsT OS                                  | Escherichia coli                  | 92.20  | 1        | 2               | 2        | 2    | 1.446E7 | 77.3     |
| A9KNK6           | Polyribonucleotide nucleotidyltransferase OS                       | Lachnoclostridium phytofermentans | 68.87  | 1        | 1               | 1        | 1    | 1.075E8 | 76.9     |
| Q5L6S5           | Elongation factor G OS                                             | Chlamydia abortus                 | 76.05  | 58       | 1               | 2        | 3    | 1.622E7 | 76.8     |
| Q67JU0           | Elongation factor G OS                                             | Symbiobacterium thermophilum      | 147.39 | 86       | 1               | 4        | 5    | 2.631E8 | 76.8     |
| Q5U8S9           | Elongation factor G OS                                             | Staphylococcus intermedius        | 98.88  | 65       | 1               | 3        | 4    | 5.177E7 | 76.7     |
| Q8A294           | Putative K(+)-stimulated pyrophosphate-energized sodium pump OS    | Bacteroides thetaiotaomicron      | 150.65 | 20       | 1               | 3        | 3    | 1.276E8 | 76.5     |
| B9DYA6           | Elongation factor G OS                                             | Clostridium kluyveri              | 136.00 | 67       | 1               | 3        | 4    | 8.826E7 | 76.4     |
| Q5WLR5           | Elongation factor G OS                                             | Bacillus clausii                  | 134.85 | 81       | 1               | 4        | 5    | 1.119E8 | 76.4     |
| Q97151           | Translation initiation factor IF-2 OS                              | Clostridium acetobutylicum        | 70.53  | 4        | 1               | 1        | 1    | 2.330E8 | 76.3     |
| A0PXU3           | Elongation factor G OS                                             | Clostridium novyi                 | 114.21 | 67       | 1               | 3        | 4    | 8.905E7 | 76.1     |
| Q18CF4           | Elongation factor G OS                                             | Clostridioides difficile          | 174.49 | 59       | 1               | 4        | 5    | 1.288E8 | 75.8     |
| Q8AB53           | Putative glucosamine-6-phosphate deaminase-like protein BT_0258 OS | Bacteroides thetaiotaomicron      | 54.10  | 1        | 1               | 1        | 1    | 4.629E6 | 75.2     |
| Q8XJ01           | Penicillin-binding protein 1A OS                                   | Clostridium perfringens           | 39.66  | 3        | 1               | 1        | 1    | 1.599E7 | 75.1     |
| A6L7J7           | Threonine--tRNA ligase OS                                          | Bacteroides vulgatus              | 91.33  | 9        | 2               | 2        | 2    | 2.440E7 | 74.2     |
| P30539           | 1,4-alpha-glucan branching enzyme GlgB OS                          | Butyrivibrio fibrisolvens         | 30.12  | 1        | 1               | 1        | 1    | 2.287E7 | 73.8     |
| B2TIT5           | Threonine--tRNA ligase OS                                          | Clostridium botulinum             | 53.61  | 2        | 1               | 1        | 1    | 1.877E7 | 73.8     |

|        |                                                                      |                                                      |        |     |    |    |    |         |      |
|--------|----------------------------------------------------------------------|------------------------------------------------------|--------|-----|----|----|----|---------|------|
| P56116 | Chaperone protein HtpG OS                                            | Helicobacter pylori                                  | 38.02  | 12  | 1  | 1  | 1  | 1.269E7 | 71.2 |
| P0A9P7 | ATP-dependent RNA helicase DeaD OS                                   | Escherichia coli O6:H1                               | 85.88  | 5   | 3  | 3  | 4  | 1.336E8 | 70.5 |
| P19410 | 3-oxocholoyl-CoA 4-desaturase OS                                     | Clostridium scindens                                 | 63.87  | 1   | 1  | 1  | 1  | 5.844E7 | 70.2 |
| Q8RHJ2 | Putative K(+)-stimulated pyrophosphate-energized sodium pump OS      | Fusobacterium nucleatum subsp. nucleatum             | 140.41 | 23  | 1  | 3  | 3  | 1.320E8 | 68.9 |
| A5CX56 | Chaperone protein DnaK OS                                            | Vesicomyosocius okutanii subsp. Calyptogena okutanii | 15.38  | 1   | 1  | 1  | 1  | 2.961E7 | 68.7 |
| Q5LG30 | Chaperone protein DnaK OS                                            | Bacteroides fragilis                                 | 418.39 | 33  | 1  | 9  | 11 | 6.399E7 | 68.6 |
| Q89YW6 | Chaperone protein DnaK OS                                            | Bacteroides thetaiotaomicron                         | 372.24 | 35  | 1  | 7  | 9  | 6.399E7 | 68.3 |
| A6L2X7 | Chaperone protein DnaK OS                                            | Bacteroides vulgatus                                 | 371.71 | 33  | 1  | 8  | 10 | 6.399E7 | 68.3 |
| Q93GF1 | Chaperone protein DnaK OS                                            | Prevotella loescheii                                 | 185.46 | 1   | 4  | 4  | 4  | 3.512E7 | 68.0 |
| A6LGR5 | 4-hydroxy-3-methylbut-2-en-1-yl diphosphate synthase (flavodoxin) OS | Parabacteroides distasonis                           | 38.34  | 5   | 1  | 1  | 1  | 2.396E7 | 67.9 |
| B8H444 | ATP-dependent zinc metalloprotease FtsH OS                           | Caulobacter vibrioides                               | 26.45  | 6   | 1  | 1  | 1  | 1.241E7 | 67.7 |
| A9KIA6 | Aspartate--tRNA(Asp/Asn) ligase OS                                   | Lachnoclostridium phytofermentans                    | 31.12  | 1   | 1  | 1  | 1  | 8.400E6 | 67.5 |
| P0AG91 | Protein translocase subunit SecD OS                                  | Escherichia coli O157:H7                             | 233.70 | 2   | 6  | 6  | 6  | 2.164E7 | 66.6 |
| Q49Y22 | Chaperone protein DnaK OS                                            | Staphylococcus saprophyticus subsp. saprophyticus    | 56.64  | 206 | 1  | 2  | 2  | 1.171E7 | 66.5 |
| A6LBU6 | Aspartate--tRNA ligase OS                                            | Parabacteroides distasonis                           | 88.06  | 49  | 1  | 2  | 2  | 7.901E6 | 66.4 |
| P21332 | Oligo-1,6-glucosidase OS                                             | Bacillus cereus                                      | 53.99  | 2   | 1  | 1  | 1  | 1.391E7 | 66.0 |
| Q8A5W4 | Lysine--tRNA ligase OS                                               | Bacteroides thetaiotaomicron                         | 154.84 | 2   | 2  | 2  | 2  | 1.304E7 | 65.9 |
| Q8GBW6 | Methylmalonyl-CoA carboxyltransferase 12S subunit OS                 | Propionibacterium freudenreichii subsp. shermanii    | 98.01  | 1   | 1  | 1  | 2  | 1.386E8 | 65.9 |
| Q67S54 | Chaperone protein DnaK OS                                            | Symbiobacterium thermophilum                         | 96.29  | 225 | 1  | 3  | 3  | 4.528E7 | 65.7 |
| Q9RQ13 | L-fucose isomerase OS                                                | Bacteroides thetaiotaomicron                         | 181.20 | 7   | 1  | 5  | 7  | 1.038E8 | 65.7 |
| A6L048 | L-fucose isomerase OS                                                | Bacteroides vulgatus                                 | 162.35 | 5   | 2  | 6  | 7  | 3.672E7 | 65.6 |
| Q56403 | V-type ATP synthase alpha chain OS                                   | Thermus thermophilus                                 | 132.50 | 30  | 1  | 1  | 2  | 1.117E7 | 63.6 |
| Q8G7I6 | Glucose-6-phosphate isomerase OS                                     | Bifidobacterium longum                               | 531.07 | 4   | 14 | 14 | 15 | 3.155E8 | 63.0 |
| Q4JX51 | Glucose-6-phosphate isomerase OS                                     | Corynebacterium jeikeium                             | 30.85  | 1   | 1  | 1  | 1  | 3.306E7 | 62.1 |
| Q8FZC4 | 2-isopropylmalate synthase OS                                        | Brucella suis biovar 1                               | 51.65  | 8   | 1  | 1  | 1  | 1.014E7 | 61.6 |
| A6TGT4 | Glucose-6-phosphate isomerase OS                                     | Klebsiella pneumoniae subsp. pneumoniae              | 53.60  | 21  | 1  | 1  | 1  | 3.337E7 | 61.3 |

|        |                                                                         |                                                                  |        |     |    |    |    |         |      |
|--------|-------------------------------------------------------------------------|------------------------------------------------------------------|--------|-----|----|----|----|---------|------|
| P0AG69 | 30S ribosomal protein S1 OS                                             | Escherichia coli O157:H7                                         | 88.52  | 1   | 2  | 2  | 2  | 8.393E6 | 61.1 |
| Q9EZ02 | Pyrophosphate--fructose 6-phosphate 1-phosphotransferase OS             | Spirochaeta thermophila                                          | 110.07 | 2   | 2  | 2  | 2  | 1.245E8 | 61.0 |
| O31716 | Uncharacterized ABC transporter ATP-binding protein YkpA OS             | Bacillus subtilis                                                | 48.45  | 1   | 1  | 1  | 1  | 2.259E6 | 61.0 |
| P59173 | Probable 2,3-bisphosphoglycerate-independent phosphoglycerate mutase OS | Leptospira interrogans serogroup Icterohaemorrhagiae serovar Lai | 61.50  | 2   | 1  | 1  | 2  | 6.104E6 | 61.0 |
| P23843 | Periplasmic oligopeptide-binding protein OS                             | Escherichia coli                                                 | 368.94 | 2   | 11 | 11 | 12 | 1.586E8 | 60.9 |
| Q0SQ82 | Formate--tetrahydrofolate ligase OS                                     | Clostridium perfringens                                          | 167.47 | 26  | 1  | 3  | 4  | 6.063E7 | 60.4 |
| P14407 | Fumarate hydratase class I, anaerobic OS                                | Escherichia coli                                                 | 66.46  | 4   | 2  | 2  | 2  | 4.922E7 | 60.1 |
| Q3A9K2 | Formate--tetrahydrofolate ligase OS                                     | Carboxydotherrmus hydrogenoformans                               | 110.68 | 55  | 1  | 3  | 3  | 3.356E8 | 60.1 |
| Q251P8 | Formate--tetrahydrofolate ligase 1 OS                                   | Desulfitobacterium hafniense                                     | 72.85  | 55  | 1  | 2  | 2  | 5.742E8 | 60.0 |
| C0QX38 | Formate--tetrahydrofolate ligase OS                                     | Brachyspira hyodysenteriae                                       | 145.04 | 9   | 1  | 2  | 3  | 2.562E7 | 60.0 |
| Q189R2 | Formate--tetrahydrofolate ligase OS                                     | Clostridioides difficile                                         | 157.46 | 1   | 3  | 3  | 3  | 1.347E9 | 59.9 |
| C4ZBG8 | Formate--tetrahydrofolate ligase OS                                     | Agathobacter rectalis                                            | 235.86 | 56  | 4  | 6  | 6  | 3.610E8 | 59.7 |
| A8AQV7 | Phosphoenolpyruvate carboxykinase (ATP) OS                              | Citrobacter koseri                                               | 104.30 | 44  | 4  | 5  | 5  | 1.300E8 | 59.6 |
| Q24ZZ8 | Formate--tetrahydrofolate ligase 2 OS                                   | Desulfitobacterium hafniense                                     | 79.67  | 55  | 1  | 2  | 2  | 5.193E8 | 59.4 |
| B2RHV8 | Phosphoenolpyruvate carboxykinase (ATP) OS                              | Porphyromonas gingivalis                                         | 188.39 | 21  | 2  | 5  | 5  | 2.446E8 | 59.4 |
| Q47VD0 | Phosphoenolpyruvate carboxykinase (ATP) OS                              | Colwellia psychrerythraea                                        | 111.53 | 16  | 1  | 2  | 2  | 1.952E8 | 59.3 |
| A1R7X2 | Arginine--tRNA ligase OS                                                | Paenarthrobacter aurescens                                       | 43.93  | 15  | 1  | 1  | 1  | 2.994E7 | 59.2 |
| Q8A414 | Phosphoenolpyruvate carboxykinase (ATP) OS                              | Bacteroides thetaiotaomicron                                     | 293.03 | 21  | 3  | 8  | 8  | 3.939E8 | 59.1 |
| C4ZBL1 | Phosphoenolpyruvate carboxykinase (ATP) OS                              | Agathobacter rectalis                                            | 501.52 | 17  | 5  | 12 | 15 | 4.167E8 | 59.0 |
| Q5L7N5 | Phosphoenolpyruvate carboxykinase (ATP) OS                              | Bacteroides fragilis                                             | 420.91 | 17  | 1  | 6  | 12 | 2.103E8 | 59.0 |
| A3CL27 | Formate--tetrahydrofolate ligase 1 OS                                   | Streptococcus sanguinis                                          | 145.32 | 20  | 1  | 2  | 3  | 3.296E7 | 59.0 |
| A6LFQ4 | Phosphoenolpyruvate carboxykinase (ATP) OS                              | Parabacteroides distasonis                                       | 438.19 | 17  | 5  | 11 | 14 | 2.336E8 | 58.9 |
| C4ZAW6 | Dihydroxy-acid dehydratase OS                                           | Agathobacter rectalis                                            | 193.87 | 6   | 5  | 6  | 6  | 2.765E7 | 58.9 |
| B9E299 | Dihydroxy-acid dehydratase OS                                           | Clostridium kluyveri                                             | 85.82  | 2   | 1  | 2  | 3  | 7.244E7 | 58.8 |
| O09460 | Phosphoenolpyruvate carboxykinase (ATP) OS                              | Anaerobiospirillum succiniciproducens                            | 214.42 | 21  | 2  | 5  | 5  | 3.702E8 | 58.6 |
| B2TIR2 | Dihydroxy-acid dehydratase OS                                           | Clostridium botulinum                                            | 46.21  | 2   | 1  | 1  | 1  | 3.131E6 | 58.5 |
| B3DTV2 | ATP synthase subunit alpha OS                                           | Bifidobacterium longum                                           | 383.31 | 393 | 9  | 11 | 12 | 5.746E7 | 58.4 |
| B3DRY6 | Bifunctional purine biosynthesis protein PurH OS                        | Bifidobacterium longum                                           | 204.27 | 2   | 3  | 3  | 3  | 1.243E8 | 58.4 |
| A6LIG0 | 60 kDa chaperonin OS                                                    | Parabacteroides distasonis                                       | 325.96 | 2   | 1  | 7  | 10 | 4.117E8 | 58.3 |

|        |                                           |                              |        |    |    |    |    |         |      |
|--------|-------------------------------------------|------------------------------|--------|----|----|----|----|---------|------|
| A5N857 | Ribonuclease Y OS                         | Clostridium kluyveri         | 85.68  | 95 | 1  | 3  | 3  | 4.874E7 | 58.3 |
| Q8G3N6 | Inosine-5'-monophosphate dehydrogenase OS | Bifidobacterium longum       | 685.57 | 20 | 15 | 16 | 19 | 2.005E8 | 58.2 |
| Q8A6P8 | 60 kDa chaperonin OS                      | Bacteroides thetaiotaomicron | 591.81 | 1  | 2  | 11 | 15 | 2.794E8 | 58.2 |
| Q5LAF6 | 60 kDa chaperonin OS                      | Bacteroides fragilis         | 690.75 | 1  | 4  | 15 | 20 | 5.301E8 | 58.2 |
| A0Q2T1 | 60 kDa chaperonin OS                      | Clostridium novyi            | 58.42  | 6  | 2  | 2  | 2  | 2.212E8 | 58.1 |
| A6KXA0 | 60 kDa chaperonin OS                      | Bacteroides vulgatus         | 948.24 | 1  | 11 | 22 | 26 | 6.146E8 | 58.1 |

**Note:** *Score*: The Mascot score. *Proteins*: The total number of proteins contained in the protein group. *Unique Peptides*: The total number of peptides unique to the protein group. *Peptides*: The total number of peptides identified from all included searches for the master protein of the protein group. *PSMs*: The total number of peptide-spectrum matches identified from all included searches for the master protein of the protein group. *Area*: The chromatographic peak area was used to characterize the quantitative abundance of protein. *MW(kDa)*: The theoretical molecular weight of the protein.
