# Supplementary material for: Pre-existing antibodies targeting a linear epitope on SARS-CoV-2 S2 cross-reacted with commensal gut bacteria and shaped vaccine induced immunity
Source: bioRxiv or medRxiv preprint supplement (doi:10.1101/2021.07.13.21260404), 2022-01-21

**Supplementary Figure 1** A dominant linear epitope recognized by pre-existing antibodies was identified on the connector domain adjacent to the N terminal of HR2 region

**A**

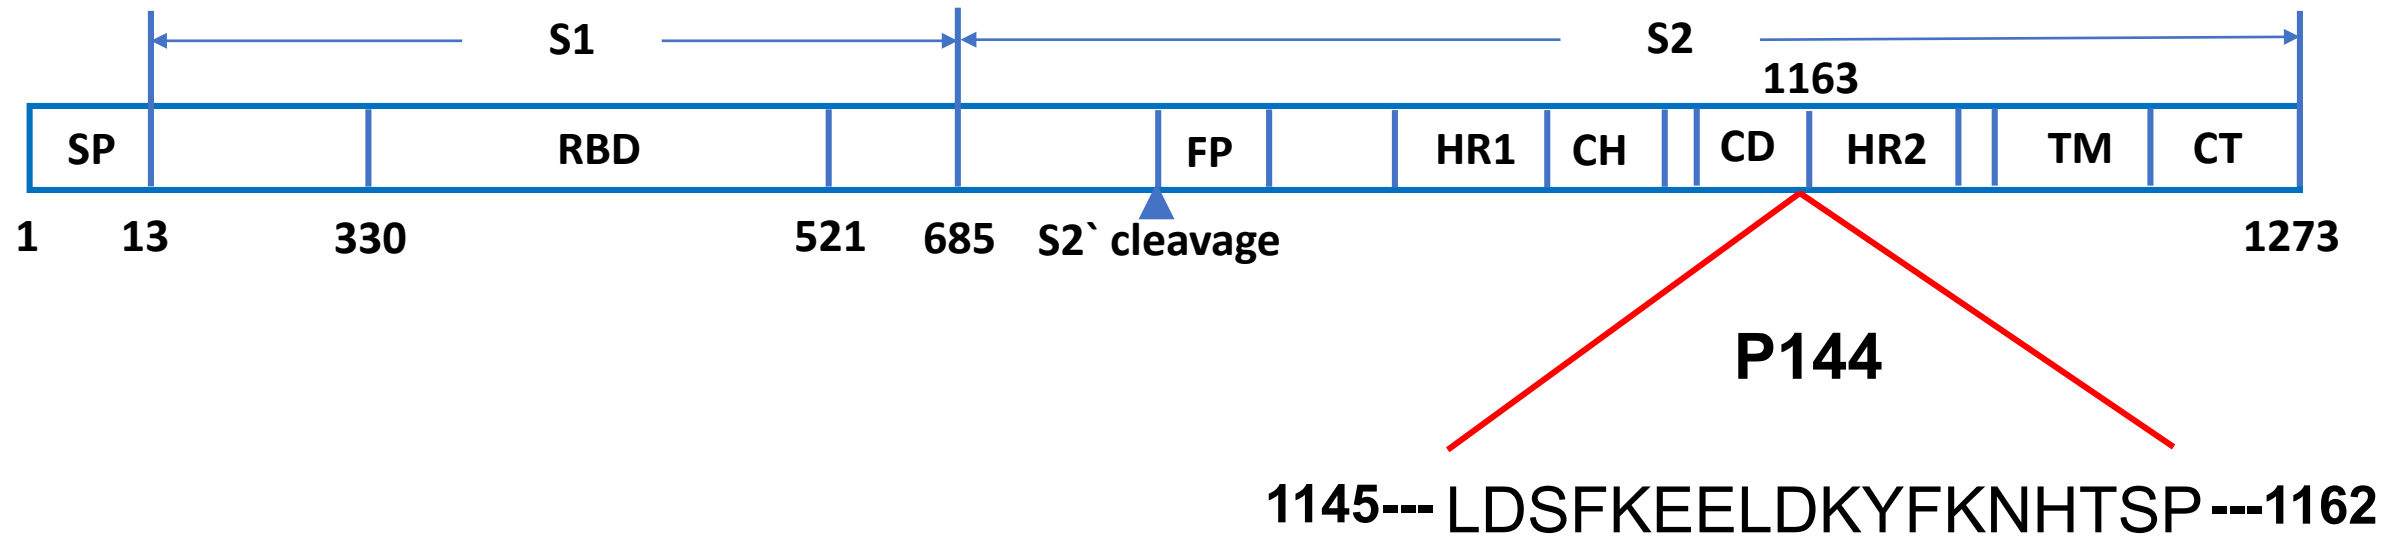

**B**

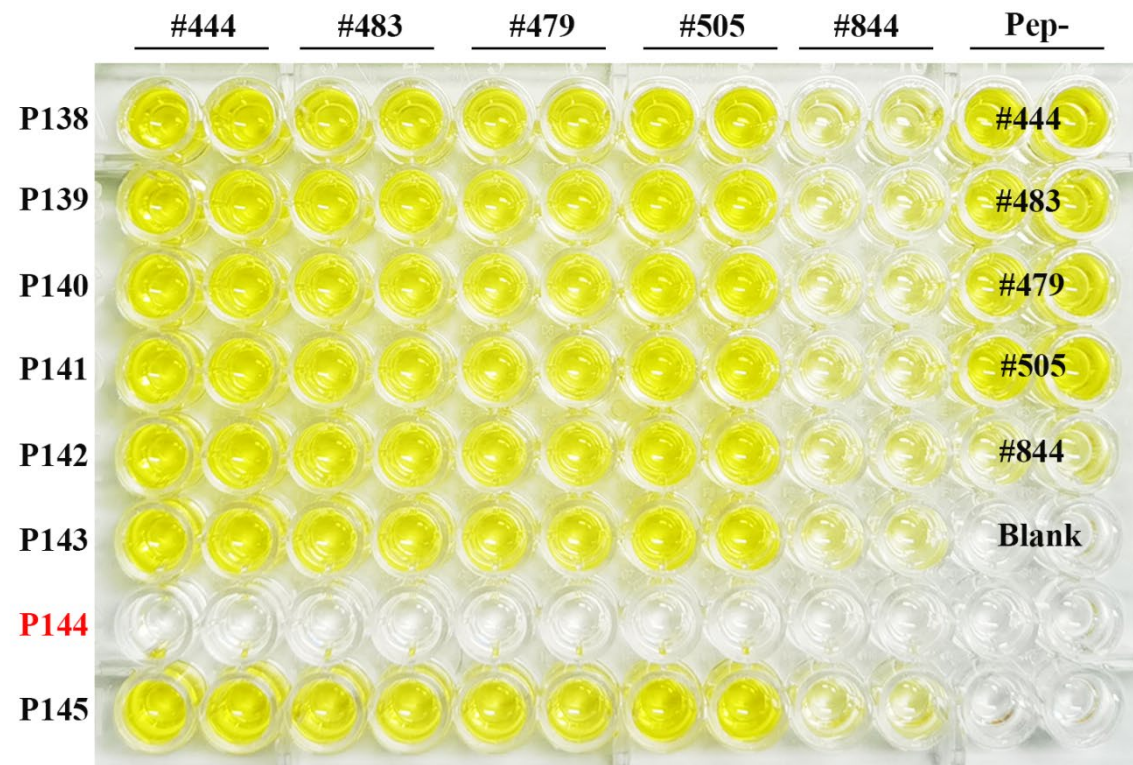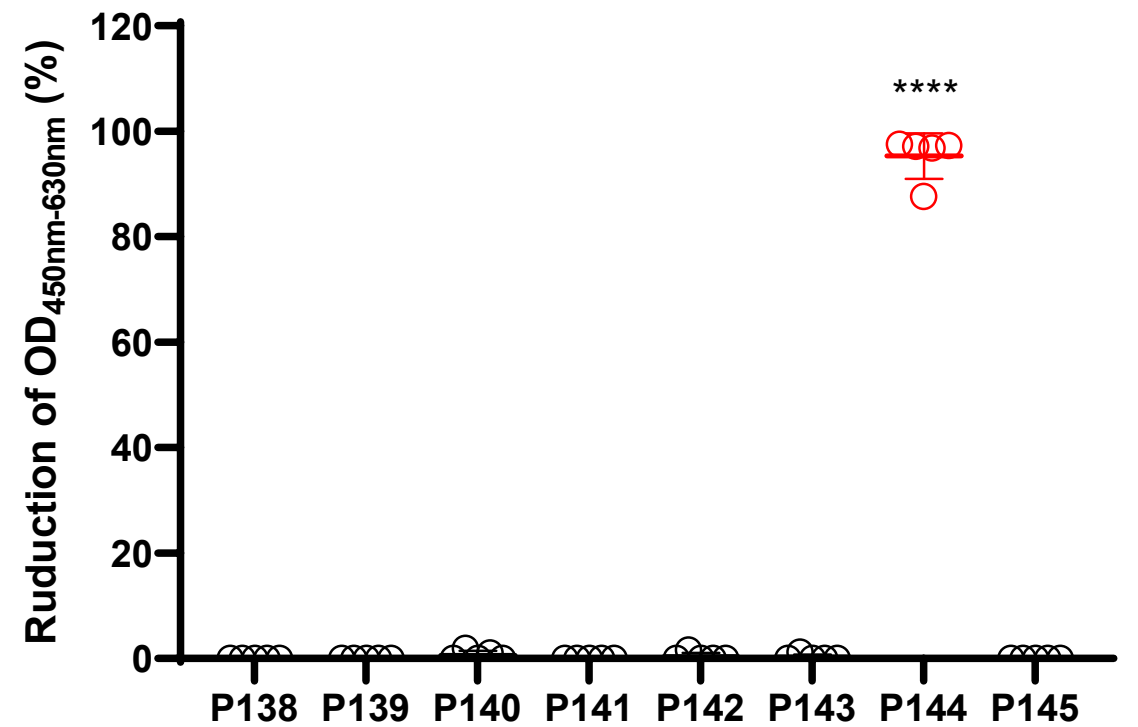

**Supplementary Figure 2** The pre-existing cross-reactive antibodies might be induced by exposure to certain gut microbial antigens

**A**

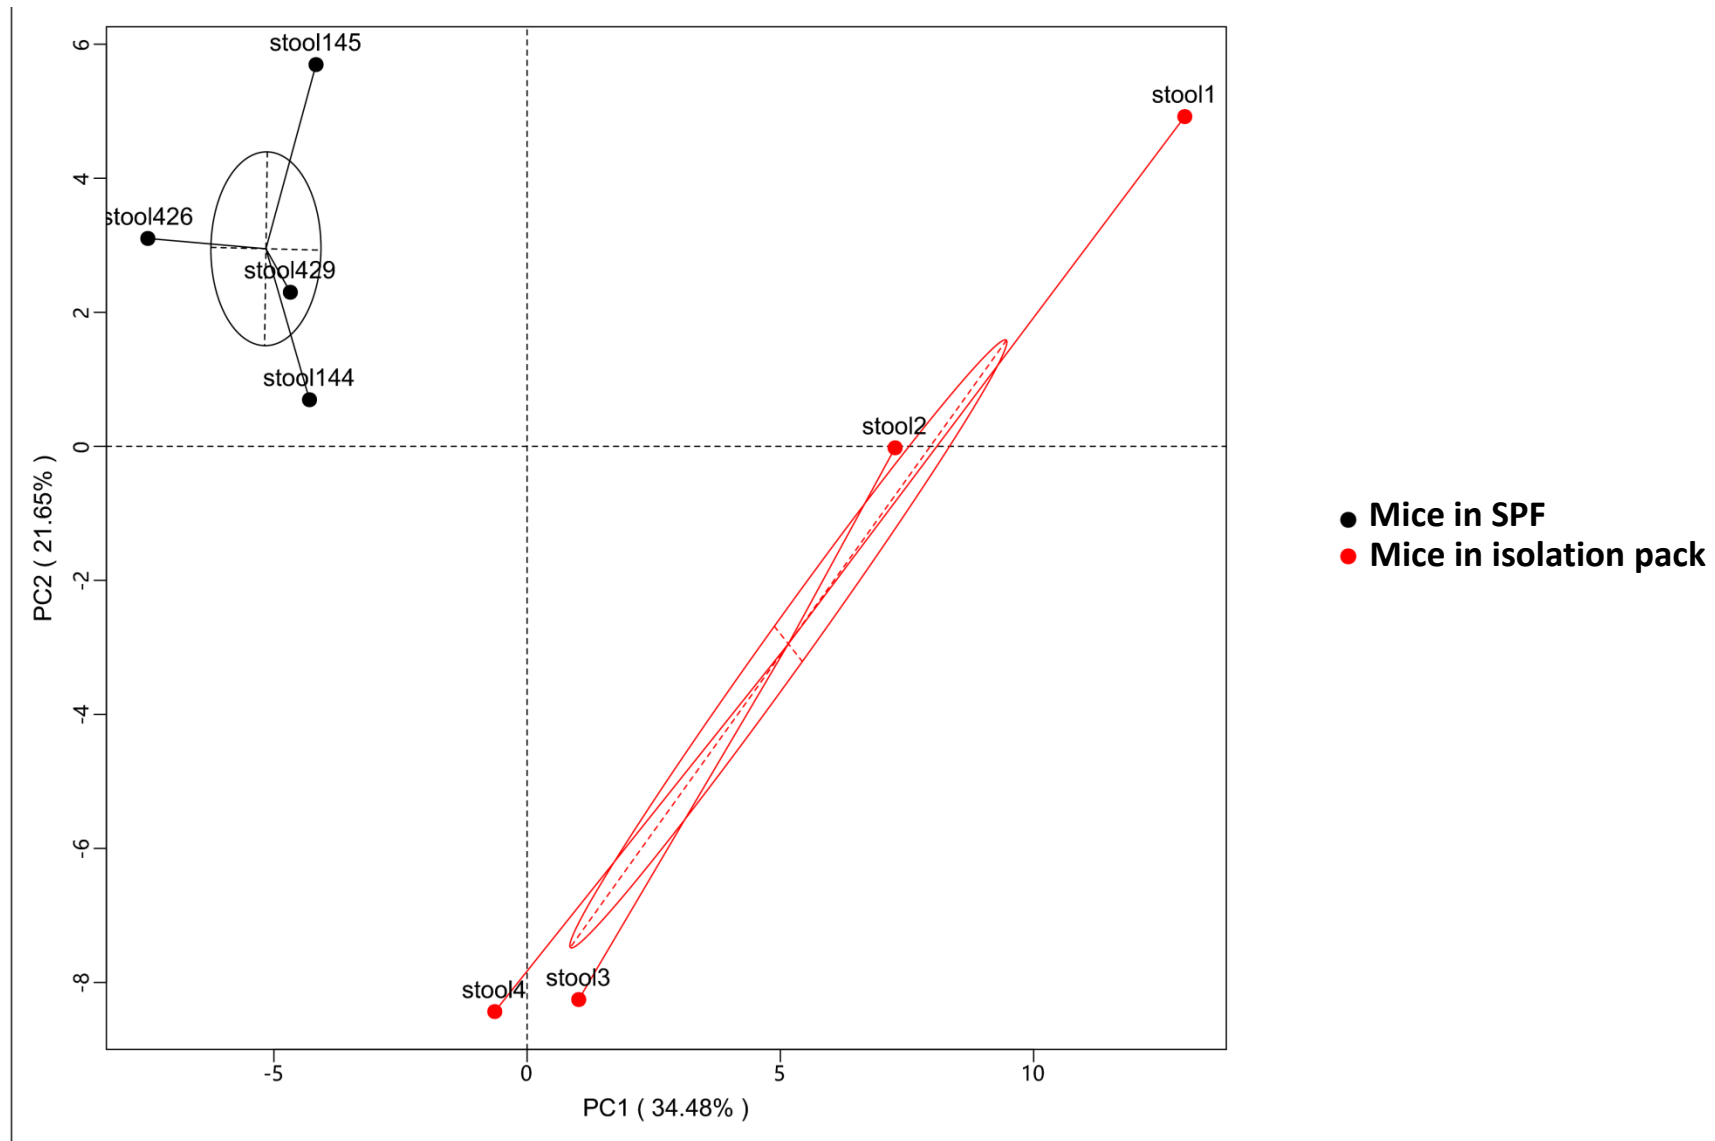

**B**

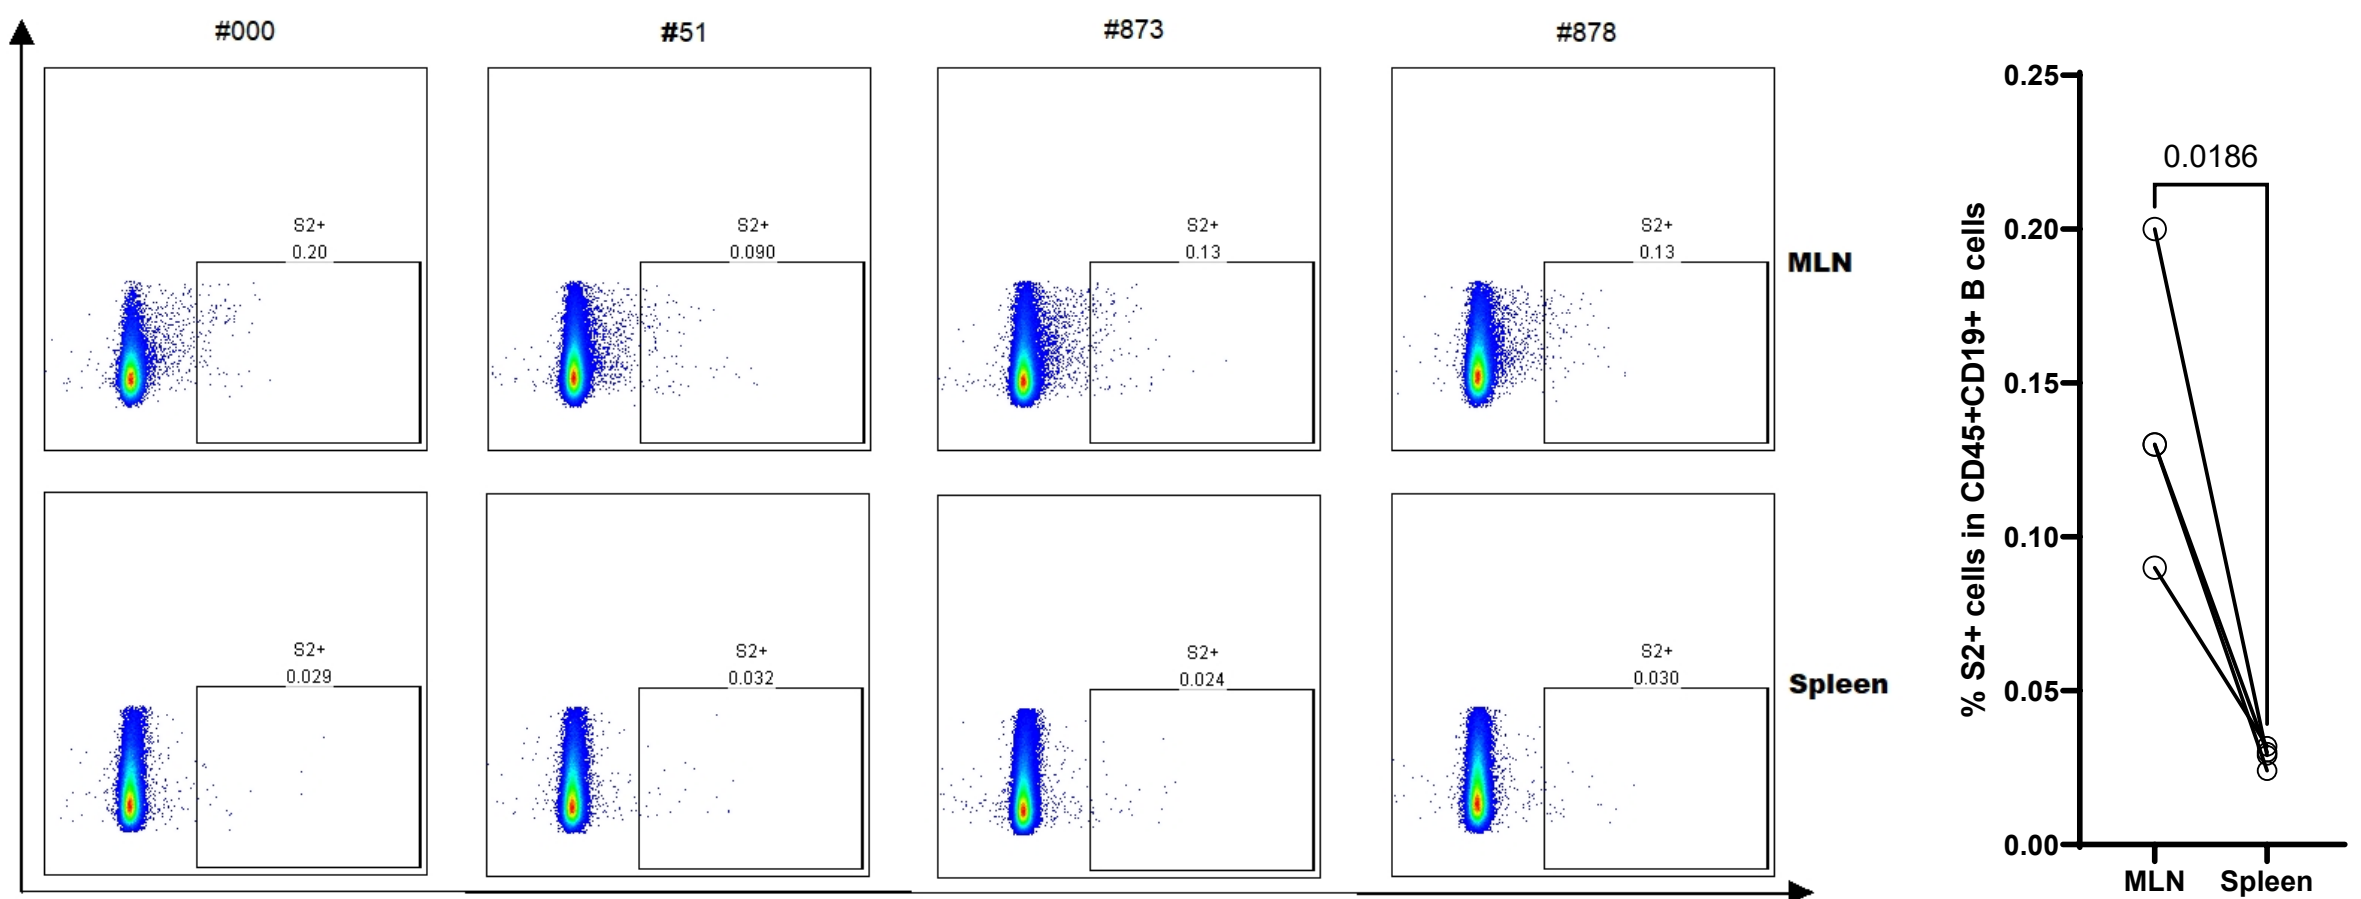

**Supplementary Figure 3** Characterizations of the minimal epitope recognitions for the 6 monoclonal antibodies isolated from naïve mice

**A**

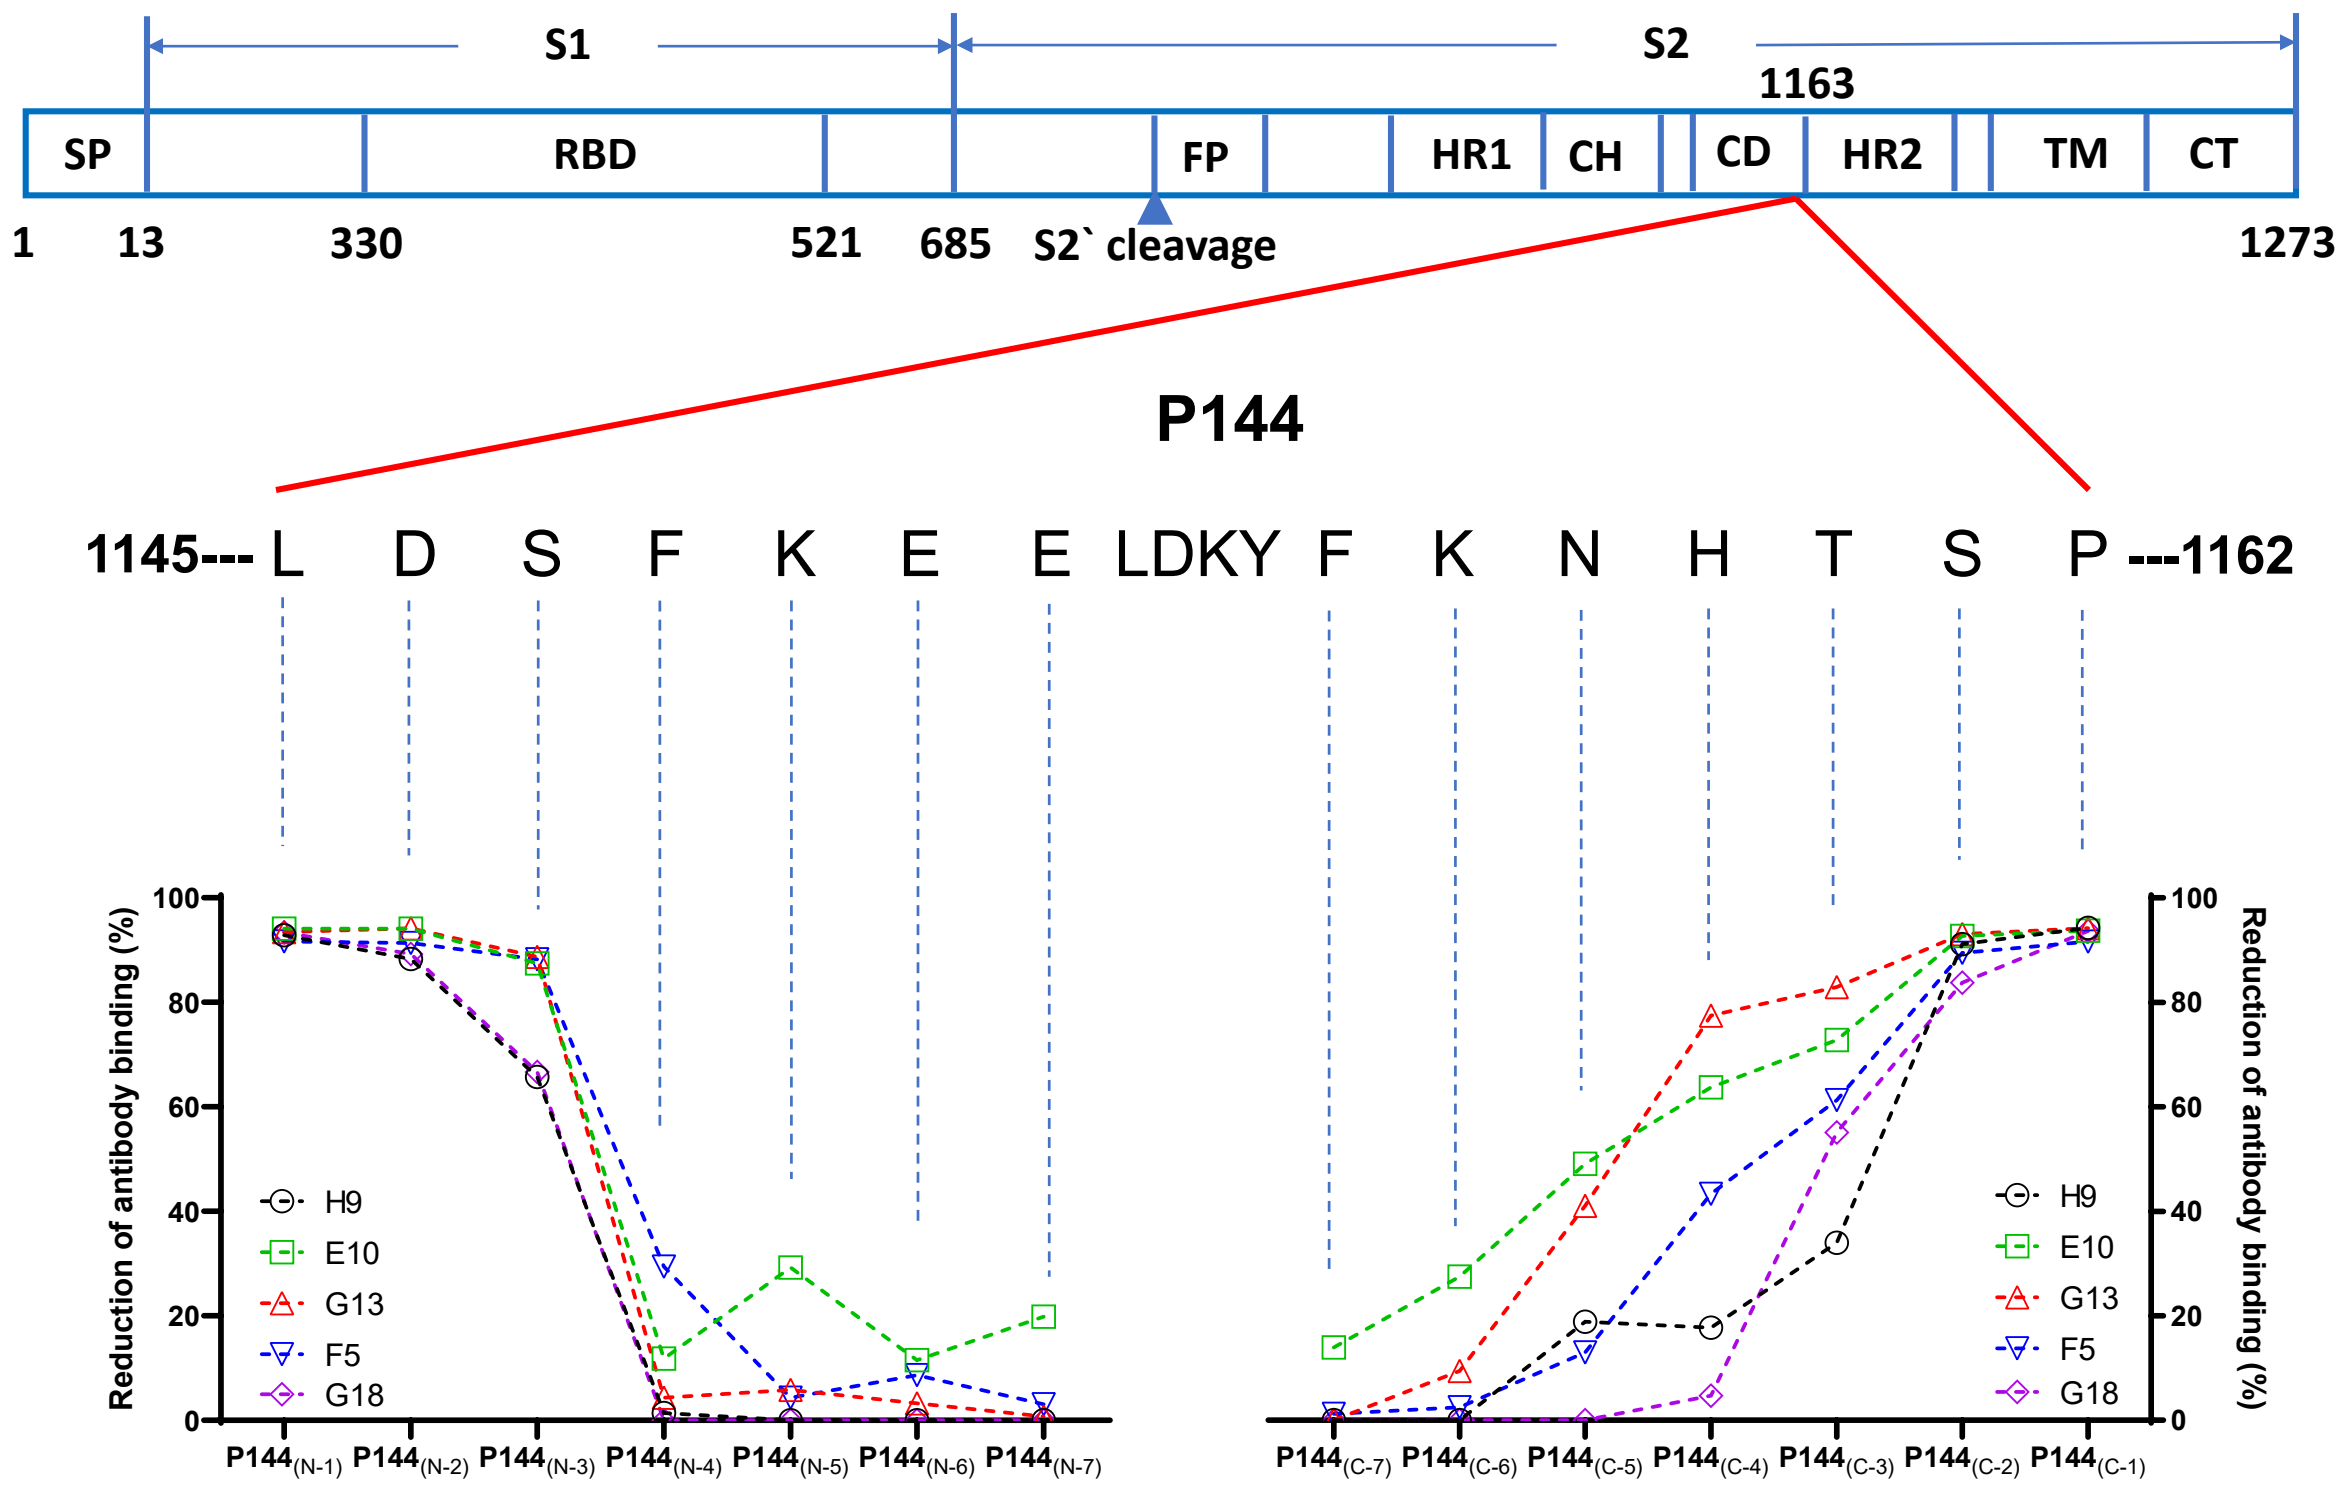

**B**

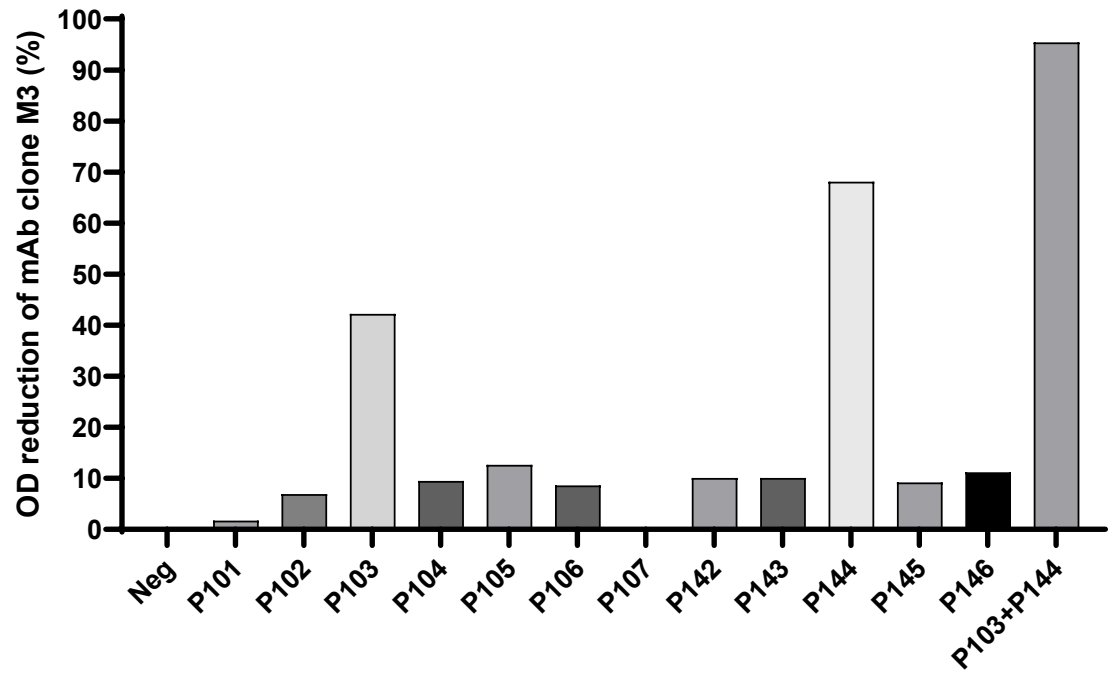

**P144: 1145- LDSFKEELDKYFKNHTSP -1162**

**P103: 817- FIEDLLFNKVTLDAGFI -834**

**Supplementary Figure 4** Neutralizing activities of the purified monoclonal antibodies as measured using a pseudo virus neutralization assay

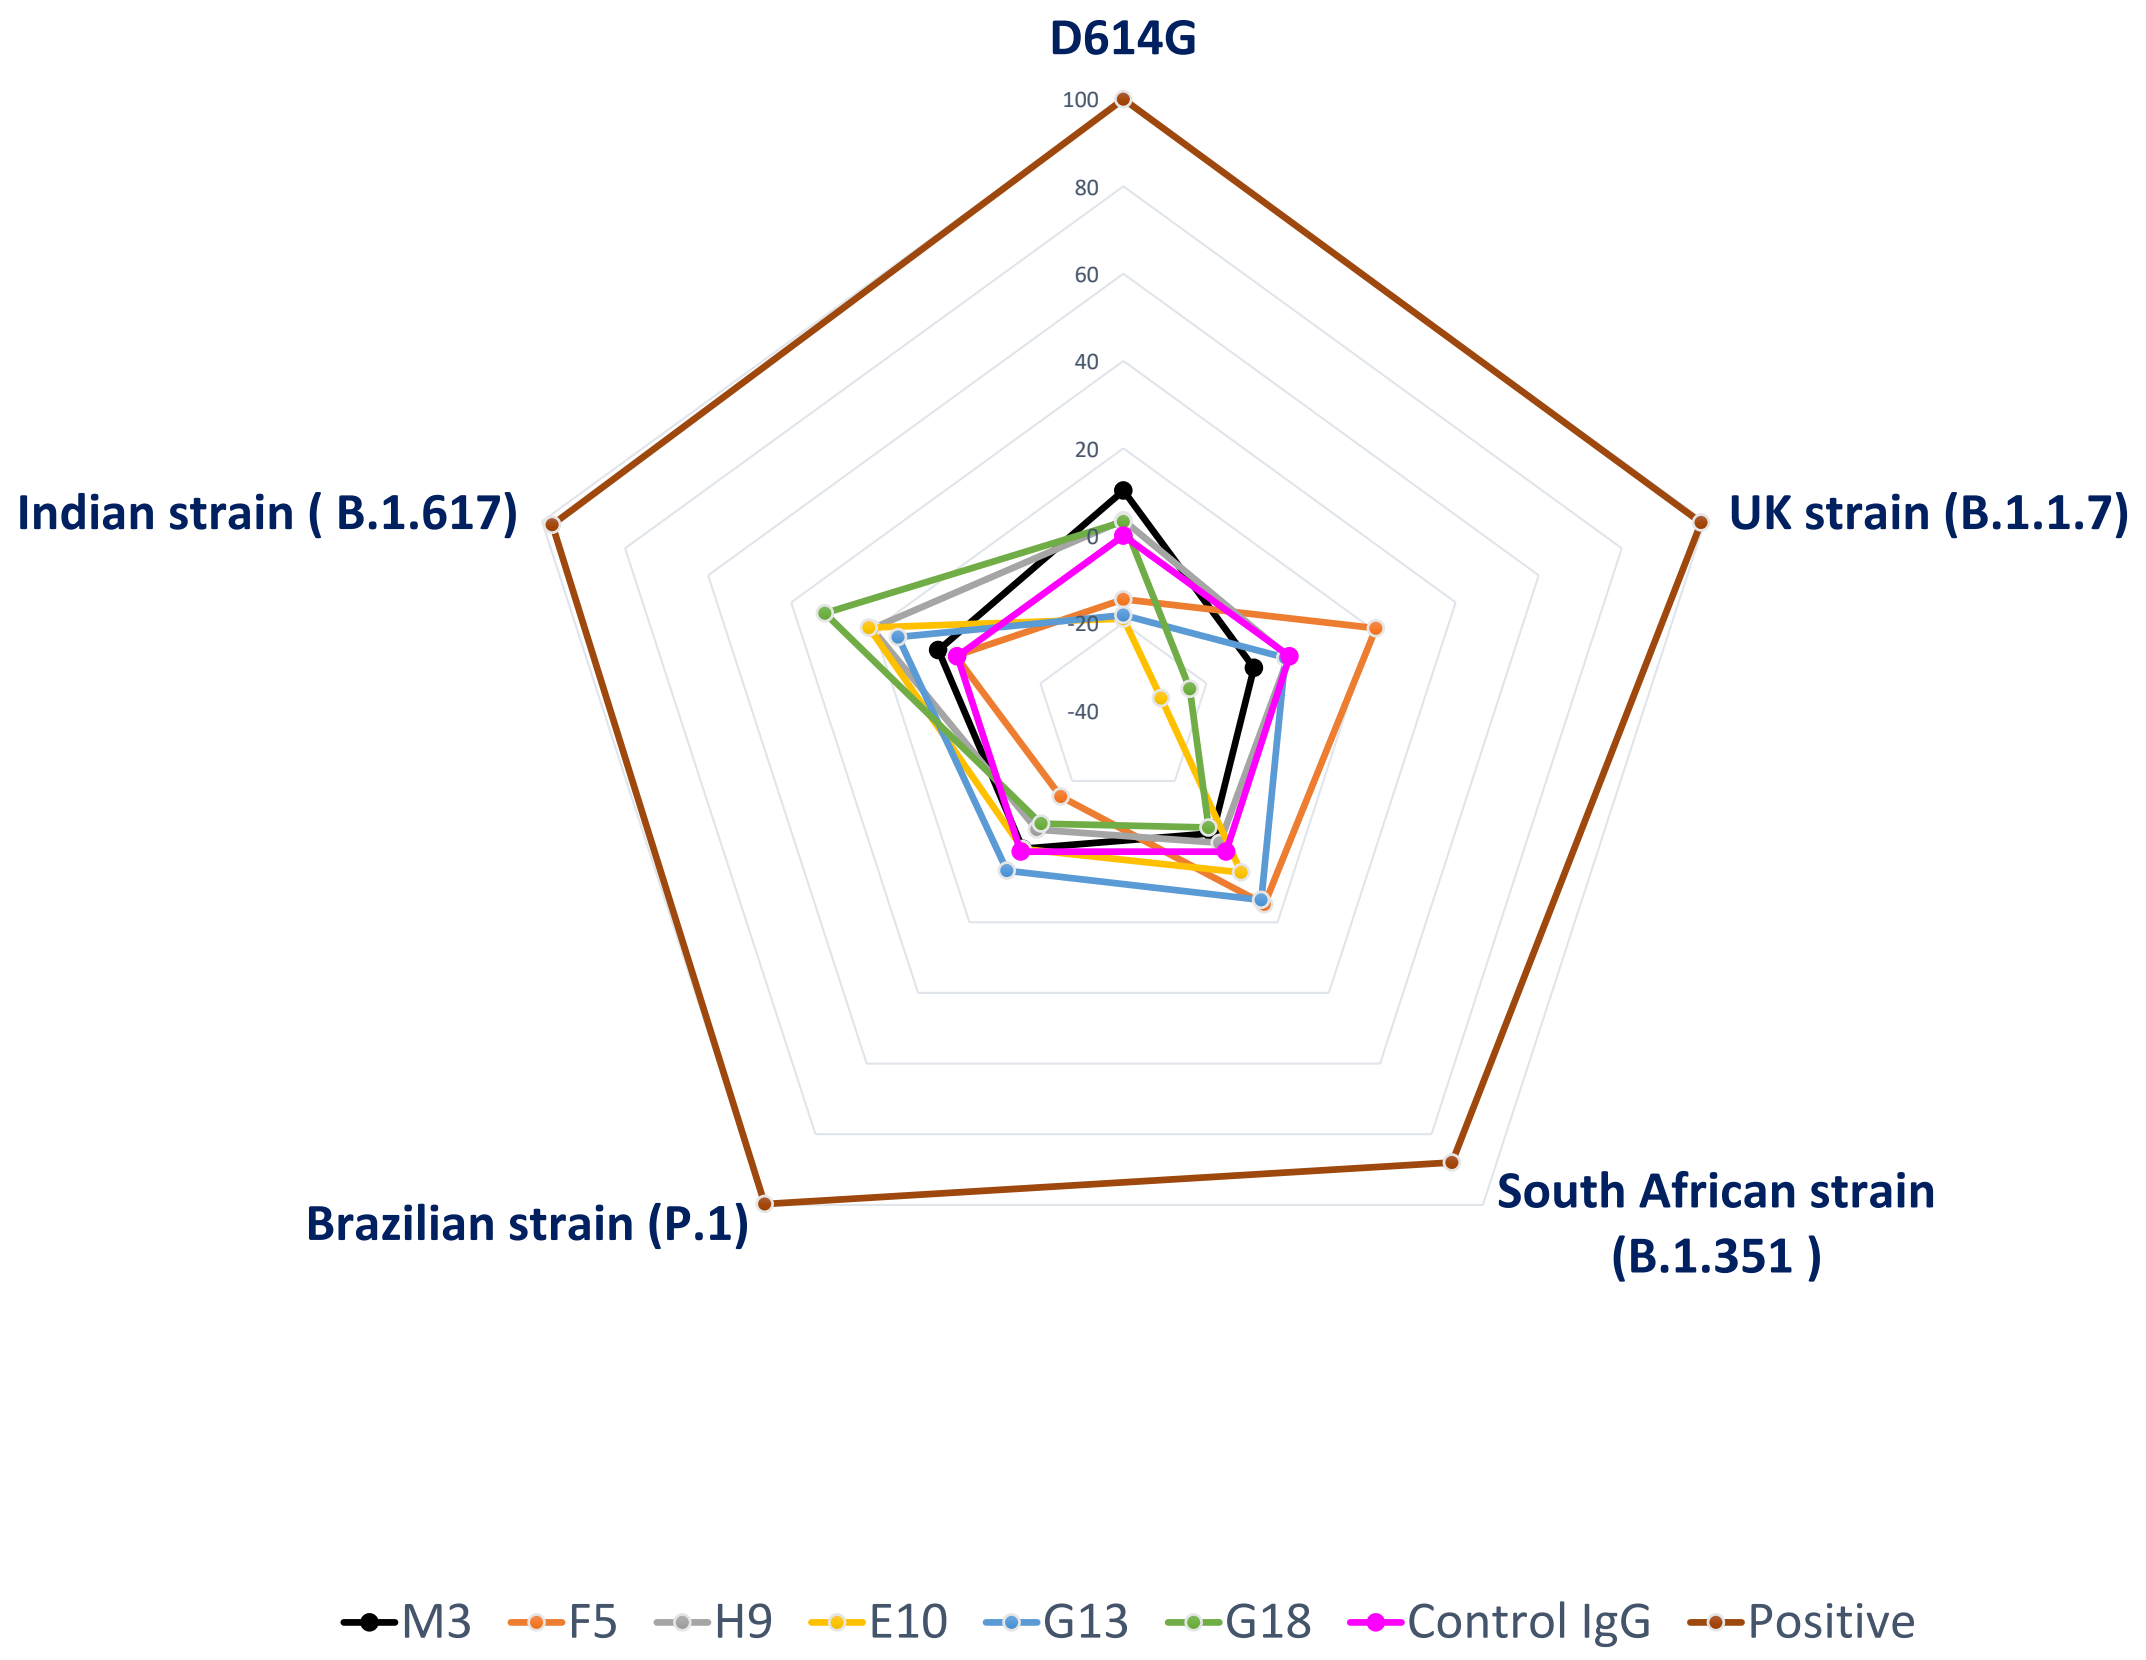

Supplement: Supplementary file [file media-1.pdf]
